# Supplementary material for: Transcriptome analysis of sugarcane reveals differential switching of major defense signaling pathways in response to Sporisorium scitamineum isolates with varying virulent attributes
Source: Front Plant Sci. 2022 Oct 17;13:969826. doi: 10.3389/fpls.2022.969826 (PMC9619058; doi:10.3389/fpls.2022.969826)
Supplement: Supplementary file 7 [file Table_5.xlsx]

## Sheet: Contents
	Supplementary File 5: Interpro
	A	InterProScan families	2dpi Ss97009 vs 2dpi control
			2dpi SsV89101 vs 2dpi control
			5dpi Ss97009 vs 5dpi control
			5dpi SsV89101 vs 5dpi control
			60dpi Ss97009 vs 60dpi control
			60dpi SsV89101 vs 60dpi control
	B	InterProScan domains	2dpi Ss97009 vs 2dpi control
			2dpi SsV89101 vs 2dpi control
			5dpi Ss97009 vs 5dpi control
			5dpi SsV89101 vs 5dpi control
			60dpi Ss97009 vs 60dpi control
			60dpi SsV89101 vs 60dpi control
	C	InterProScan sites	2dpi Ss97009 vs 2dpi control
			2dpi SsV89101 vs 2dpi control
			5dpi Ss97009 vs 5dpi control
			5dpi SsV89101 vs 5dpi control
			60dpi Ss97009 vs 60dpi control
			60dpi SsV89101 vs 60dpi control

## Sheet: A) InterProScan Families
2dpi Ss97009 vs 2dpi control			2dpi SsV89101 vs 2 dpi control			5dpi Ss97009 vs 5dpi control			5dpi SsV89101 vs 5dpi control			60dpi Ss97009 vs 60dpi control			60dpi SsV89101 vs 60dpi control
IPS Family	#Seqs		IPS Family	#Seqs		IPS Family	#Seqs		IPS Family	#Seqs		IPS Family	#Seqs		IPS Family	#Seqs
(IPR043502) DNA/RNA polymerase superfamily	15		(IPR043502) DNA/RNA polymerase superfamily	6		(IPR012340) Nucleic acid-binding, OB-fold	32		(IPR027417) P-loop containing nucleoside triphosphate hydrolase	9		(IPR027417) P-loop containing nucleoside triphosphate hydrolase	15		(IPR027417) P-loop containing nucleoside triphosphate hydrolase	5
(IPR027417) P-loop containing nucleoside triphosphate hydrolase	13		(IPR036396) Cytochrome P450 superfamily	5		(IPR027417) P-loop containing nucleoside triphosphate hydrolase	19		(IPR011009) Protein kinase-like domain superfamily	8		(IPR010255) Haem peroxidase superfamily	9		(IPR043502) DNA/RNA polymerase superfamily	4
(IPR036396) Cytochrome P450 superfamily	11		(IPR001938) Thaumatin family	5		(IPR008991) Translation protein SH3-like domain superfamily	16		(IPR008930) Terpenoid cyclases/protein prenyltransferase alpha-alpha toroid	6		(IPR008972) Cupredoxin	9		(IPR042308) Helper-component proteinase (HC-Pro) cysteine protease (CPD) domain superfamily	4
(IPR043504) Peptidase S1, PA clan, chymotrypsin-like fold	8		(IPR027417) P-loop containing nucleoside triphosphate hydrolase	5		(IPR014722) Ribosomal protein L2, domain 2	14		(IPR013083) Zinc finger, RING/FYVE/PHD-type	5		(IPR009057) Homeobox-like domain superfamily	8		(IPR036514) SGNH hydrolase superfamily	3
(IPR001938) Thaumatin family	7		(IPR012340) Nucleic acid-binding, OB-fold	5		(IPR036291) NAD(P)-binding domain superfamily	13		(IPR018333) Squalene cyclase	5		(IPR011009) Protein kinase-like domain superfamily	7		(IPR036312) Bifunctional inhibitor/plant lipid transfer protein/seed storage helical domain superfamily	3
(IPR037176) Osmotin/thaumatin-like superfamily	7		(IPR009072) Histone-fold	5		(IPR036259) MFS transporter superfamily	9		(IPR032675) Leucine-rich repeat domain superfamily	5		(IPR000823) Plant peroxidase	7		(IPR001456) Helper component proteinase	2
(IPR012340) Nucleic acid-binding, OB-fold	7		(IPR037176) Osmotin/thaumatin-like superfamily	4		(IPR009000) Translation protein, beta-barrel domain superfamily	9		(IPR036961) Kinesin motor domain superfamily	5		(IPR045087) Multicopper oxidase	7		(IPR044659) Protein PELPK-like	2
(IPR009003) Peptidase S1, PA clan	6		(IPR036249) Thioredoxin-like superfamily	4		(IPR017853) Glycoside hydrolase superfamily	8		(IPR009057) Homeobox-like domain superfamily	4		(IPR013785) Aldolase-type TIM barrel	6		(IPR032675) Leucine-rich repeat domain superfamily	2
(IPR016461) O-methyltransferase COMT-type	5		(IPR001128) Cytochrome P450	4		(IPR011332) Zinc-binding ribosomal protein	8		(IPR036249) Thioredoxin-like superfamily	4		(IPR027434) Homing endonuclease	6		(IPR035995) Bowman-Birk type proteinase inhibitor	2
(IPR036249) Thioredoxin-like superfamily	5		(IPR010255) Haem peroxidase superfamily	4		(IPR029071) Ubiquitin-like domain superfamily	8		(IPR036396) Cytochrome P450 superfamily	3		(IPR043129) ATPase, nucleotide binding domain	5		(IPR043325) Alpha-Amylase Inhibitors (AAI), Lipid Transfer (LT) and Seed Storage (SS) Protein	2
(IPR001128) Cytochrome P450	5		(IPR008686) RNA-dependent RNA polymerase, mitoviral	4		(IPR036388) Winged helix-like DNA-binding domain superfamily	8		(IPR036312) Bifunctional inhibitor/plant lipid transfer protein/seed storage helical domain superfamily	3		(IPR017853) Glycoside hydrolase superfamily	5		(IPR001087) GDSL lipase/esterase	2
(IPR042308) Helper-component proteinase (HC-Pro) cysteine protease (CPD) domain superfamily	5		(IPR002401) Cytochrome P450, E-class, group I	3		(IPR013126) Heat shock protein 70 family	7		(IPR036955) AP2/ERF domain superfamily	3		(IPR022251) Protein of unknown function wound-induced	5		(IPR036093) NAC domain superfamily	2
(IPR017853) Glycoside hydrolase superfamily	5		(IPR011051) RmlC-like cupin domain superfamily	3		(IPR012156) Cold shock, CspA	7		(IPR015813) Pyruvate/Phosphoenolpyruvate kinase-like domain superfamily	3		(IPR036396) Cytochrome P450 superfamily	4		(IPR036908) RlpA-like domain superfamily	1
(IPR002401) Cytochrome P450, E-class, group I	4		(IPR000823) Plant peroxidase	3		(IPR036396) Cytochrome P450 superfamily	7		(IPR000823) Plant peroxidase	3		(IPR043502) DNA/RNA polymerase superfamily	4		(IPR003690) Transcription termination factor, mitochondrial/chloroplastic	1
(IPR036282) Glutathione S-transferase, C-terminal domain superfamily	4		(IPR032675) Leucine-rich repeat domain superfamily	3		(IPR034704) L28p-like	7		(IPR016024) Armadillo-type fold	3		(IPR036291) NAD(P)-binding domain superfamily	4		(IPR023346) Lysozyme-like domain superfamily	1
(IPR029063) S-adenosyl-L-methionine-dependent methyltransferase	4		(IPR043504) Peptidase S1, PA clan, chymotrypsin-like fold	3		(IPR029064) 50S ribosomal protein L30e-like	6		(IPR039361) Cyclin	3		(IPR032675) Leucine-rich repeat domain superfamily	4		(IPR036150) Cytochrome b/b6, C-terminal domain superfamily	1
(IPR045087) Multicopper oxidase	4		(IPR035940) CAP superfamily	3		(IPR036249) Thioredoxin-like superfamily	6		(IPR009072) Histone-fold	3		(IPR004000) Actin family	3		(IPR035669) GDSL lipase/esterase-like, plant	1
(IPR008972) Cupredoxin	4		(IPR002119) Histone H2A	2		(IPR001492) Flagellin	6		(IPR010255) Haem peroxidase superfamily	3		(IPR004265) Dirigent protein	3		(IPR039265) Putative lipid-transfer protein DIR1-like	1
(IPR045073) Glutathione S-transferase Omega/Tau-like	4		(IPR001911) Ribosomal protein S21	2		(IPR043129) ATPase, nucleotide binding domain	6		(IPR029058) Alpha/Beta hydrolase fold	3		(IPR002213) UDP-glucuronosyl/UDP-glucosyltransferase	3		(IPR038765) Papain-like cysteine peptidase superfamily	1
(IPR001456) Helper component proteinase	4		(IPR012156) Cold shock, CspA	2		(IPR009072) Histone-fold	6		(IPR021135) Phosphoenolpyruvate carboxylase	3		(IPR029058) Alpha/Beta hydrolase fold	3		(IPR027443) Isopenicillin N synthase-like superfamily	1
(IPR036291) NAD(P)-binding domain superfamily	3		(IPR036312) Bifunctional inhibitor/plant lipid transfer protein/seed storage helical domain superfamily	2		(IPR002347) Short-chain dehydrogenase/reductase SDR	5		(IPR002401) Cytochrome P450, E-class, group I	3		(IPR013320) Concanavalin A-like lectin/glucanase domain superfamily	3		(IPR008930) Terpenoid cyclases/protein prenyltransferase alpha-alpha toroid	1
(IPR044792) Protein TAR1	3		(IPR038380) Ribosomal protein S21 superfamily	2		(IPR023395) Mitochondrial carrier domain superfamily	5		(IPR036291) NAD(P)-binding domain superfamily	3		(IPR002347) Short-chain dehydrogenase/reductase SDR	3		(IPR007493) Protein of unknown function DUF538	1
(IPR011051) RmlC-like cupin domain superfamily	3		(IPR036955) AP2/ERF domain superfamily	2		(IPR043502) DNA/RNA polymerase superfamily	5		(IPR001563) Peptidase S10, serine carboxypeptidase	3		(IPR029071) Ubiquitin-like domain superfamily	3		(IPR004265) Dirigent protein	1
(IPR029071) Ubiquitin-like domain superfamily	3		(IPR016039) Thiolase-like	2		(IPR036390) Winged helix DNA-binding domain superfamily	5		(IPR001128) Cytochrome P450	3		(IPR044846) Glycoside hydrolase family 10	3		(IPR000823) Plant peroxidase	1
(IPR000490) Glycoside hydrolase family 17	3		(IPR001951) Histone H4	2		(IPR005828) Major facilitator, sugar transporter-like	5		(IPR016177) DNA-binding domain superfamily	3		(IPR008686) RNA-dependent RNA polymerase, mitoviral	3		(IPR010255) Haem peroxidase superfamily	1
(IPR014710) RmlC-like jelly roll fold	3		(IPR001283) Cysteine-rich secretory protein-related	2		(IPR036986) RNA-binding S4 domain superfamily	5		(IPR035992) Ricin B-like lectins	3		(IPR029064) 50S ribosomal protein L30e-like	2		(IPR011009) Protein kinase-like domain superfamily	1
(IPR001592) Potyvirus coat protein	3		(IPR029063) S-adenosyl-L-methionine-dependent methyltransferase	2		(IPR016461) O-methyltransferase COMT-type	4		(IPR011011) Zinc finger, FYVE/PHD-type	3		(IPR001087) GDSL lipase/esterase	2		(IPR045034) O-acyltransferase WSD1-like	1
(IPR001929) Germin	2		(IPR012110) Thiamine pyrophosphate (TPP)-dependent enzyme	2		(IPR023298) P-type ATPase, transmembrane domain superfamily	4		(IPR036188) FAD/NAD(P)-binding domain superfamily	2		(IPR036312) Bifunctional inhibitor/plant lipid transfer protein/seed storage helical domain superfamily	2		(IPR006459) Casparian strip membrane protein	1
(IPR012156) Cold shock, CspA	2		(IPR016177) DNA-binding domain superfamily	2		(IPR015813) Pyruvate/Phosphoenolpyruvate kinase-like domain superfamily	4		(IPR000115) Phosphoribosylglycinamide synthetase	2		(IPR009001) Translation elongation factor EF1A/initiation factor IF2gamma, C-terminal	2		(IPR005795) Major pollen allergen Lol pI	1
(IPR000864) Proteinase inhibitor I13, potato inhibitor I	2		(IPR044808) Ethylene-responsive transcription factor	2		(IPR002113) ADP/ATP carrier protein, eukaryotic type	4		(IPR036430) Ribonuclease T2-like superfamily	2		(IPR036770) Ankyrin repeat-containing domain superfamily	2		(IPR039773) Molecular chaperone regulator BAG	1
(IPR000754) Ribosomal protein S9	2		(IPR005050) Early nodulin 93 ENOD93 protein	2		(IPR036419) Ribosomal protein S3, C-terminal domain superfamily	4		(IPR027443) Isopenicillin N synthase-like superfamily	2		(IPR001461) Aspartic peptidase A1 family	2		(IPR036749) Expansin, cellulose-binding-like domain superfamily	1
(IPR036908) RlpA-like domain superfamily	2		(IPR029061) Thiamin diphosphate-binding fold	2		(IPR035971) Cellulose-binding domain superfamily	4		(IPR029044) Nucleotide-diphospho-sugar transferases	2		(IPR036257) Cytochrome C oxidase subunit II, transmembrane domain superfamily	2		(IPR036322) WD40-repeat-containing domain superfamily	1
(IPR011332) Zinc-binding ribosomal protein	2		(IPR001456) Helper component proteinase	2		(IPR000217) Tubulin	4		(IPR005050) Early nodulin 93 ENOD93 protein	2		(IPR037176) Osmotin/thaumatin-like superfamily	2		(IPR000864) Proteinase inhibitor I13, potato inhibitor I	1
(IPR016039) Thiolase-like	2		(IPR002213) UDP-glucuronosyl/UDP-glucosyltransferase	2		(IPR043141) Ribosomal protein L10-like domain superfamily	4		(IPR013815) ATP-grasp fold, subdomain 1	2		(IPR021109) Aspartic peptidase domain superfamily	2		(IPR043504) Peptidase S1, PA clan, chymotrypsin-like fold	1
(IPR039421) Type 1 protein exporter	2		(IPR000490) Glycoside hydrolase family 17	2		(IPR000597) Ribosomal protein L3	4		(IPR029061) Thiamin diphosphate-binding fold	2		(IPR013126) Heat shock protein 70 family	2		(IPR036533) BAG domain superfamily	1
(IPR044965) Glycoside hydrolase family 17, plant	2		(IPR036514) SGNH hydrolase superfamily	2		(IPR015424) Pyridoxal phosphate-dependent transferase	4		(IPR002213) UDP-glucuronosyl/UDP-glucosyltransferase	2		(IPR009000) Translation protein, beta-barrel domain superfamily	2		(IPR036965) Terpene synthase, N-terminal domain superfamily	1
(IPR036354) Proteinase inhibitor I13, potato inhibitor I superfamily	2		(IPR011141) Polyketide synthase, type III	2		(IPR001128) Cytochrome P450	4		(IPR017853) Glycoside hydrolase superfamily	2		(IPR036249) Thioredoxin-like superfamily	2		(IPR023213) Chloramphenicol acetyltransferase-like domain superfamily	1
(IPR036318) FAD-binding, type PCMH-like superfamily	2		(IPR042308) Helper-component proteinase (HC-Pro) cysteine protease (CPD) domain superfamily	2		(IPR015688) Elongation Factor 3	4		(IPR045000) Tropinone reductase	2		(IPR027443) Isopenicillin N synthase-like superfamily	2		(IPR000618) Insect cuticle protein	1
(IPR038587) Ribosomal protein L40e superfamily	2		(IPR017853) Glycoside hydrolase superfamily	2		(IPR015421) Pyridoxal phosphate-dependent transferase, major domain	4		(IPR000864) Proteinase inhibitor I13, potato inhibitor I	2		(IPR001362) Glycoside hydrolase, family 32	2		(IPR005299) SAM dependent carboxyl methyltransferase	1
(IPR027443) Isopenicillin N synthase-like superfamily	2		(IPR012864) Cysteine oxygenase/2-aminoethanethiol dioxygenase	2		(IPR012678) Ribosomal protein L23/L15e core domain superfamily	4		(IPR014729) Rossmann-like alpha/beta/alpha sandwich fold	2		(IPR029044) Nucleotide-diphospho-sugar transferases	2		(IPR029063) S-adenosyl-L-methionine-dependent methyltransferase	1
(IPR043128) Reverse transcriptase/Diguanylate cyclase domain	2		(IPR009003) Peptidase S1, PA clan	2		(IPR008930) Terpenoid cyclases/protein prenyltransferase alpha-alpha toroid	4		(IPR011989) Armadillo-like helical	2		(IPR036879) Transcription factor, MADS-box superfamily	2		(IPR036354) Proteinase inhibitor I13, potato inhibitor I superfamily	1
(IPR036629) YjbJ superfamily	2		(IPR014710) RmlC-like jelly roll fold	2		(IPR002150) Ribosomal protein L31	4		(IPR016039) Thiolase-like	2		(IPR036378) FAS1 domain superfamily	2		(IPR009003) Peptidase S1, PA clan	1
(IPR034704) L28p-like	2		(IPR001929) Germin	1		(IPR026569) Ribosomal protein L28/L24	3		(IPR001951) Histone H4	2		(IPR035990) Triosephosphate isomerase superfamily	2		(IPR036758) At5g01610-like superfamily	1
(IPR002347) Short-chain dehydrogenase/reductase SDR	2		(IPR005749) Ribosomal protein L15, bacterial-type	1		(IPR038662) F1F0 ATP synthase subunit C superfamily	3		(IPR036354) Proteinase inhibitor I13, potato inhibitor I superfamily	2		(IPR005050) Early nodulin 93 ENOD93 protein	2		(IPR036861) Endochitinase-like superfamily	1
(IPR044076) Ribosomal protein P2	2		(IPR006350) Intron endonuclease, group I	1		(IPR001911) Ribosomal protein S21	3		(IPR013320) Concanavalin A-like lectin/glucanase domain superfamily	2		(IPR007770) Protein DMP	2		(IPR036457) PPM-type phosphatase domain superfamily	1
(IPR009072) Histone-fold	2		(IPR007493) Protein of unknown function DUF538	1		(IPR014726) Ribosomal protein L2, domain 3	3		(IPR012110) Thiamine pyrophosphate (TPP)-dependent enzyme	2		(IPR009072) Histone-fold	2		(IPR038538) MTERF superfamily, mitochondrial/chloroplastic	1
(IPR020568) Ribosomal protein S5 domain 2-type fold	2		(IPR016461) O-methyltransferase COMT-type	1		(IPR038380) Ribosomal protein S21 superfamily	3		(IPR040412) Uncharacterized protein At1g65710-like	2		(IPR039904) TPR and ankyrin repeat-containing protein 1	2		(IPR027387) Cytochrome b/b6-like domain superfamily	1
(IPR014721) Ribosomal protein S5 domain 2-type fold, subgroup	2		(IPR008176) Defensin, plant	1		(IPR009001) Translation elongation factor EF1A/initiation factor IF2gamma, C-terminal	3		(IPR044808) Ethylene-responsive transcription factor	2		(IPR004730) Transaldolase type 1	2		(IPR015943) WD40/YVTN repeat-like-containing domain superfamily	1
(IPR011141) Polyketide synthase, type III	2		(IPR002299) Porin, Neisseria sp. type	1		(IPR000702) Ribosomal protein L6	3		(IPR036915) Cyclin-like superfamily	2		(IPR003676) Small auxin-up RNA	2
(IPR035940) CAP superfamily	2		(IPR006904) Protein of unknown function DUF716	1		(IPR011009) Protein kinase-like domain superfamily	3		(IPR037045) Peptidase S8 propeptide/proteinase inhibitor I9 superfamily	2		(IPR000425) Major intrinsic protein	2
(IPR000217) Tubulin	1		(IPR036749) Expansin, cellulose-binding-like domain superfamily	1		(IPR038187) NAC A/B domain superfamily	3		(IPR044974) Disease resistance protein, plants	2		(IPR005493) Ribonuclease E inhibitor RraA/RraA-like protein	2
(IPR026569) Ribosomal protein L28/L24	1		(IPR037468) ARGOS/ARL/OSR1	1		(IPR008250) P-type ATPase, A domain superfamily	3		(IPR001568) Ribonuclease T2-like	2		(IPR001585) Transaldolase/Fructose-6-phosphate aldolase	2
(IPR002119) Histone H2A	1		(IPR036047) F-box-like domain superfamily	1		(IPR011701) Major facilitator superfamily	3		(IPR001154) DNA topoisomerase II, eukaryotic-type	1		(IPR010203) Regulator of ribonuclease activity A	2
(IPR036891) Signal recognition particle, SRP54 subunit, M-domain superfamily	1		(IPR036927) Cytochrome c oxidase-like, subunit I superfamily	1		(IPR005103) Glycoside hydrolase, family 61	3		(IPR010031) L-gulonolactone/D-arabinono-1,4-lactone oxidase	1		(IPR004468) CTP synthase	2
(IPR024791) Cytochrome c oxidase subunit III	1		(IPR027434) Homing endonuclease	1		(IPR001780) Ribosomal protein L35A	3		(IPR002119) Histone H2A	1		(IPR045055) DNA2/NAM7-like helicase	2
(IPR001062) Transcription antitermination protein, NusG	1		(IPR023213) Chloramphenicol acetyltransferase-like domain superfamily	1		(IPR018492) Ribosomal protein L7Ae/L8/Nhp2 family	3		(IPR021825) Protein RETICULATA-related	1		(IPR036704) Ribonuclease E inhibitor RraA/RraA-like superfamily	2
(IPR037147) Ribosomal protein L28/L24 superfamily	1		(IPR001574) Ribosome-inactivating protein	1		(IPR023214) HAD superfamily	3		(IPR044636) Transcription factor RADIALIS-like	1		(IPR023213) Chloramphenicol acetyltransferase-like domain superfamily	2
(IPR042187) Flagellin, C-terminal domain, subdomain 2	1		(IPR036574) Knottin, scorpion toxin-like superfamily	1		(IPR016039) Thiolase-like	3		(IPR023395) Mitochondrial carrier domain superfamily	1		(IPR034294) Aquaporin transporter	2
(IPR008176) Defensin, plant	1		(IPR023621) Ribosomal protein L31e domain superfamily	1		(IPR018333) Squalene cyclase	3		(IPR035995) Bowman-Birk type proteinase inhibitor	1		(IPR045003) Fasciclin-like arabinogalactan protein, group A	2
(IPR001911) Ribosomal protein S21	1		(IPR001865) Ribosomal protein S2	1		(IPR038843) Cell wall protein Sed1/Spi1	3		(IPR001525) C-5 cytosine methyltransferase	1		(IPR036093) NAC domain superfamily	2
(IPR013324) RNA polymerase sigma factor, region 3/4-like	1		(IPR001087) GDSL lipase/esterase	1		(IPR035921) F/V-ATP synthase subunit C superfamily	3		(IPR001574) Ribosome-inactivating protein	1		(IPR044850) Cysteine-rich and transmembrane domain-containing protein WIH1/2-like	2
(IPR006904) Protein of unknown function DUF716	1		(IPR008335) Eukaryotic molybdopterin oxidoreductase	1		(IPR036227) Ribosomal L18e/L15P superfamily	3		(IPR020946) Flavin monooxygenase-like	1		(IPR011993) PH-like domain superfamily	2
(IPR036749) Expansin, cellulose-binding-like domain superfamily	1		(IPR036093) NAC domain superfamily	1		(IPR023614) Porin domain superfamily	3		(IPR001087) GDSL lipase/esterase	1		(IPR023271) Aquaporin-like	2
(IPR008280) Tubulin/FtsZ, C-terminal	1		(IPR001684) Ribosomal protein L27	1		(IPR008686) RNA-dependent RNA polymerase, mitoviral	3		(IPR012392) Very-long-chain 3-ketoacyl-CoA synthase	1		(IPR001938) Thaumatin family	2
(IPR004240) Nonaspanin (TM9SF)	1		(IPR036282) Glutathione S-transferase, C-terminal domain superfamily	1		(IPR037147) Ribosomal protein L28/L24 superfamily	3		(IPR011798) Adenosine 5'-phosphosulphate reductase	1		(IPR036388) Winged helix-like DNA-binding domain superfamily	2
(IPR027434) Homing endonuclease	1		(IPR036291) NAD(P)-binding domain superfamily	1		(IPR036525) Tubulin/FtsZ, GTPase domain superfamily	3		(IPR006912) Harbinger transposase-derived protein	1		(IPR045034) O-acyltransferase WSD1-like	2
(IPR035979) RNA-binding domain superfamily	1		(IPR036908) RlpA-like domain superfamily	1		(IPR005822) Ribosomal protein L13	3		(IPR033337) MT-associated protein TORTIFOLIA1/SPIRAL2-like	1		(IPR001128) Cytochrome P450	2
(IPR008974) TRAF-like	1		(IPR000218) Ribosomal protein L14P	1		(IPR013785) Aldolase-type TIM barrel	3		(IPR011060) Ribulose-phosphate binding barrel	1		(IPR000652) Triosephosphate isomerase	2
(IPR036574) Knottin, scorpion toxin-like superfamily	1		(IPR023346) Lysozyme-like domain superfamily	1		(IPR036877) SUI1 domain superfamily	3		(IPR016138) Ribosome-inactivating protein, subdomain 1	1		(IPR036875) Zinc finger, CCHC-type superfamily	2
(IPR023621) Ribosomal protein L31e domain superfamily	1		(IPR000883) Cytochrome c oxidase subunit I	1		(IPR040442) Pyruvate kinase-like domain superfamily	3		(IPR043502) DNA/RNA polymerase superfamily	1		(IPR037848) GEM-like protein	2
(IPR009960) Fungal fruit body lectin	1		(IPR044533) FCS-Like Zinc finger 1/2/3	1		(IPR001884) Translation elongation factor IF5A-like	3		(IPR007250) Heat shock protein 9/12	1		(IPR037045) Peptidase S8 propeptide/proteinase inhibitor I9 superfamily	2
(IPR019906) Ribosomal protein L6, bacterial-type	1		(IPR010683) Protein of unknown function DUF1262	1		(IPR015946) K homology domain-like, alpha/beta	3		(IPR007229) Nicotinate phosphoribosyltransferase family	1		(IPR036404) Jacalin-like lectin domain superfamily	2
(IPR001865) Ribosomal protein S2	1		(IPR042106) NADH-ubiquinone/plastoquinone oxidoreductase chain 6, subunit NuoJ	1		(IPR000456) Ribosomal protein L17	3		(IPR040079) Glutathione Transferase family	1		(IPR036514) SGNH hydrolase superfamily	2
(IPR010920) LSM domain superfamily	1		(IPR006138) NADH-ubiquinone oxidoreductase, 20 Kd subunit	1		(IPR036673) Cyanovirin-N superfamily	3		(IPR001461) Aspartic peptidase A1 family	1		(IPR005150) Cellulose synthase	2
(IPR013083) Zinc finger, RING/FYVE/PHD-type	1		(IPR044965) Glycoside hydrolase family 17, plant	1		(IPR036373) Ribosomal protein L17 superfamily	3		(IPR011051) RmlC-like cupin domain superfamily	1		(IPR036397) Ribonuclease H superfamily	1
(IPR036312) Bifunctional inhibitor/plant lipid transfer protein/seed storage helical domain superfamily	1		(IPR036052) Tryptophan synthase beta subunit-like PLP-dependent enzyme	1		(IPR000454) ATP synthase, F0 complex, subunit C	3		(IPR037176) Osmotin/thaumatin-like superfamily	1		(IPR001929) Germin	1
(IPR036735) NusG, N-terminal domain superfamily	1		(IPR040404) Phylloplanin-like	1		(IPR002171) Ribosomal protein L2	3		(IPR001283) Cysteine-rich secretory protein-related	1		(IPR042104) Polyketide synthase, dehydratase domain superfamily	1
(IPR016169) FAD-binding, type PCMH, subdomain 2	1		(IPR044206) EG45-like domain containing protein, plant	1		(IPR029039) Flavoprotein-like superfamily	3		(IPR016181) Acyl-CoA N-acyltransferase	1		(IPR027484) Phosphatidylinositol-4-phosphate 5-kinase, N-terminal	1
(IPR038380) Ribosomal protein S21 superfamily	1		(IPR031111) L-3-cyanoalanine synthase, mitochondrial	1		(IPR002401) Cytochrome P450, E-class, group I	3		(IPR017938) Riboflavin synthase-like beta-barrel	1		(IPR006350) Intron endonuclease, group I	1
(IPR039335) Sigma factor binding protein 1/2	1		(IPR006214) Bax inhibitor 1-related	1		(IPR003663) Sugar/inositol transporter	3		(IPR006214) Bax inhibitor 1-related	1		(IPR044716) Transcriptional corepressor LEUNIG-like	1
(IPR039876) 28kDa heat- and acid-stable phosphoprotein	1		(IPR007118) Expansin/Lol pI	1		(IPR036908) RlpA-like domain superfamily	3		(IPR013785) Aldolase-type TIM barrel	1		(IPR001580) Calreticulin/calnexin	1
(IPR001697) Pyruvate kinase	1		(IPR003480) Transferase	1		(IPR038661) Ribosomal protein L35A superfamily	3		(IPR016139) Ribosome-inactivating protein, subdomain 2	1		(IPR023395) Mitochondrial carrier domain superfamily	1
(IPR009001) Translation elongation factor EF1A/initiation factor IF2gamma, C-terminal	1		(IPR003945) NADH-plastoquinone oxidoreductase, chain 5	1		(IPR044792) Protein TAR1	3		(IPR021109) Aspartic peptidase domain superfamily	1		(IPR023391) Protein translocase SecE domain superfamily	1
(IPR011037) Pyruvate kinase-like, insert domain superfamily	1		(IPR021109) Aspartic peptidase domain superfamily	1		(IPR001951) Histone H4	3		(IPR008928) Six-hairpin glycosidase superfamily	1		(IPR030689) Cytochrome b	1
(IPR023346) Lysozyme-like domain superfamily	1		(IPR002150) Ribosomal protein L31	1		(IPR036899) Ribosomal protein L13 superfamily	3		(IPR023292) NTP pyrophosphohydrolase-like domain superfamily	1		(IPR039884) Coiled-coil domain-containing protein R3HC1/R3HCL	1
(IPR023214) HAD superfamily	1		(IPR023591) Ribosomal protein S2, flavodoxin-like domain superfamily	1		(IPR013320) Concanavalin A-like lectin/glucanase domain superfamily	3		(IPR044791) Beta-glucanase/XTH	1		(IPR000245) V-ATPase proteolipid subunit	1
(IPR002583) Ribosomal protein S20	1		(IPR001457) NADH:ubiquinone/plastoquinone oxidoreductase, chain 6	1		(IPR036838) Ribosomal protein S10 domain superfamily	3		(IPR044817) Squamosa promoter-binding-like protein	1		(IPR036927) Cytochrome c oxidase-like, subunit I superfamily	1
(IPR036150) Cytochrome b/b6, C-terminal domain superfamily	1		(IPR008803) RHD3/Sey1	1		(IPR022234) Protein of unknown function DUF3759	3		(IPR044591) Microtubule-associated kinase-like protein RUNKEL	1		(IPR033326) E3 ubiquitin-protein ligase BAH1	1
(IPR038534) Rtr1/RPAP2 domain superfamily	1		(IPR004963) Pectinacetylesterase/NOTUM	1		(IPR038582) S27a-like superfamily	3		(IPR044859) Allene oxide cyclase/Dirigent protein	1		(IPR036187) DNA mismatch repair protein MutS, core domain superfamily	1
(IPR016035) Acyl transferase/acyl hydrolase/lysophospholipase	1		(IPR044859) Allene oxide cyclase/Dirigent protein	1		(IPR036789) Ribosomal protein L6, alpha-beta domain superfamily	3		(IPR009000) Translation protein, beta-barrel domain superfamily	1		(IPR036188) FAD/NAD(P)-binding domain superfamily	1
(IPR000702) Ribosomal protein L6	1		(IPR011856) tRNA endonuclease-like domain superfamily	1		(IPR043164) 50S ribosomal protein L10, insertion domain superfamily	3		(IPR007145) Microtubule-associated protein, MAP65/Ase1/PRC1	1		(IPR035382) Mating factor A1	1
(IPR044301) Pathogenesis-related protein-4	1		(IPR032710) NTF2-like domain superfamily	1		(IPR022801) Ribosomal protein S4/S9	3		(IPR019508) Proteinase inhibitor I48, clitocypin	1		(IPR012392) Very-long-chain 3-ketoacyl-CoA synthase	1
(IPR011009) Protein kinase-like domain superfamily	1		(IPR044961) Tetratricopeptide repeat protein POLLENLESS 3/SULFUR DEFICIENCY-INDUCED 1	1		(IPR029048) Heat shock protein 70kD, C-terminal domain superfamily	3		(IPR016496) GTPase HflX	1		(IPR016174) Di-haem cytochrome, transmembrane	1
(IPR004780) Signal recognition particle protein	1		(IPR027443) Isopenicillin N synthase-like superfamily	1		(IPR042105) Ribosomal protein L31 superfamily	3		(IPR004265) Dirigent protein	1		(IPR030184) WAT1-related protein	1
(IPR044533) FCS-Like Zinc finger 1/2/3	1		(IPR004265) Dirigent protein	1		(IPR001790) Ribosomal protein L10P	3		(IPR040262) Uncharacterized protein At4g38062-like	1		(IPR015421) Pyridoxal phosphate-dependent transferase, major domain	1
(IPR010992) Integration host factor (IHF)-like DNA-binding domain superfamily	1		(IPR035901) GIY-YIG endonuclease superfamily	1		(IPR001848) Ribosomal protein S10	3		(IPR036852) Peptidase S8/S53 domain superfamily	1		(IPR007736) Caleosin-related	1
(IPR042106) NADH-ubiquinone/plastoquinone oxidoreductase chain 6, subunit NuoJ	1		(IPR008972) Cupredoxin	1		(IPR002453) Beta tubulin	3		(IPR022024) Protein of unknown function DUF3602	1		(IPR008606) Eukaryotic translation initiation factor 4E binding	1
(IPR036918) Pyruvate kinase, C-terminal domain superfamily	1		(IPR030878) Ribosomal protein L15	1		(IPR002119) Histone H2A	2		(IPR036322) WD40-repeat-containing domain superfamily	1		(IPR008811) Glycosyl hydrolases 36	1
(IPR000119) Histone-like DNA-binding protein	1		(IPR005795) Major pollen allergen Lol pI	1		(IPR001925) Porin, eukaryotic type	2		(IPR000380) DNA topoisomerase, type IA	1		(IPR017904) ADF/Cofilin	1
(IPR023123) Tubulin, C-terminal	1		(IPR036853) Ribosomal protein L14 superfamily	1		(IPR001757) P-type ATPase	2		(IPR012337) Ribonuclease H-like superfamily	1		(IPR001425) Archaeal/bacterial/fungal rhodopsins	1
(IPR001283) Cysteine-rich secretory protein-related	1		(IPR045073) Glutathione S-transferase Omega/Tau-like	1		(IPR036927) Cytochrome c oxidase-like, subunit I superfamily	2		(IPR036879) Transcription factor, MADS-box superfamily	1		(IPR011060) Ribulose-phosphate binding barrel	1
(IPR044819) Triacylglycerol lipase OBL1-like	1		(IPR009424) Arabinogalactan protein 16/20/22/41	1		(IPR015972) Ribosomal protein L19/L19e, domain 1	2		(IPR001884) Translation elongation factor IF5A-like	1		(IPR007658) Protein of unknown function DUF594	1
(IPR044206) EG45-like domain containing protein, plant	1		(IPR000054) Ribosomal protein L31e	1		(IPR036603) RNA polymerase, RBP11-like subunit	2		(IPR036890) Histidine kinase/HSP90-like ATPase superfamily	1		(IPR044643) N-(5'-phosphoribosyl)anthranilate isomerase family	1
(IPR036388) Winged helix-like DNA-binding domain superfamily	1		(IPR035810) Phosphatidylethanolamine-binding protein, eukaryotic	1		(IPR000589) Ribosomal protein S15	2		(IPR045054) Prolyl 4-hydroxylase	1		(IPR004776) Membrane transport protein	1
(IPR011250) Outer membrane protein/outer membrane enzyme PagP, beta-barrel	1		(IPR014756) Immunoglobulin E-set	1		(IPR039255) Large ribosomal RNA subunit accumulation protein YceD, bacteria	2		(IPR002067) Mitochondrial carrier protein	1		(IPR011051) RmlC-like cupin domain superfamily	1
(IPR026669) Arsenite methyltransferase-like	1		(IPR045054) Prolyl 4-hydroxylase	1		(IPR036955) AP2/ERF domain superfamily	2		(IPR002113) ADP/ATP carrier protein, eukaryotic type	1		(IPR013762) Integrase-like, catalytic domain superfamily	1
(IPR009060) UBA-like superfamily	1		(IPR002413) Venom allergen 5-like	1		(IPR000892) Ribosomal protein S26e	2		(IPR032996) Ultraviolet-B receptor UVR8	1		(IPR038630) Ribosomal protein L24e/L24 superfamily	1
(IPR000347) Metallothionein, family 15, plant	1		(IPR036610) PEBP-like superfamily	1		(IPR038630) Ribosomal protein L24e/L24 superfamily	2		(IPR000131) ATP synthase, F1 complex, gamma subunit	1		(IPR036527) SCP2 sterol-binding domain superfamily	1
(IPR015813) Pyruvate/Phosphoenolpyruvate kinase-like domain superfamily	1		(IPR036758) At5g01610-like superfamily	1		(IPR038237) Ribosomal protein S4e, central domain superfamily	2		(IPR010530) NADH-ubiquinone reductase complex 1 MLRQ subunit	1		(IPR011010) DNA breaking-rejoining enzyme, catalytic core	1
(IPR039607) VQ motif-containing protein 8/17/18/20/21/25	1		(IPR034704) L28p-like	1		(IPR036769) Ribosomal protein L11, C-terminal domain superfamily	2		(IPR008545) WEB family	1		(IPR029062) Class I glutamine amidotransferase-like	1
(IPR003945) NADH-plastoquinone oxidoreductase, chain 5	1		(IPR005093) RNA-directed RNA polymerase beta-chain	1		(IPR027534) Ribosomal protein L12/P1/P2 family	2		(IPR013760) DNA topoisomerase, type IIA-like domain superfamily	1		(IPR000347) Metallothionein, family 15, plant	1
(IPR044856) Malate synthase, C-terminal superfamily	1		(IPR010530) NADH-ubiquinone reductase complex 1 MLRQ subunit	1		(IPR004368) Translation initiation factor IF-1	2		(IPR016197) Chromo-like domain superfamily	1		(IPR003480) Transferase	1
(IPR012677) Nucleotide-binding alpha-beta plait domain superfamily	1		(IPR030316) Sulfate transporter 3.5	1		(IPR005716) Ribosomal protein S5/S7, eukaryotic/archaeal	2		(IPR022805) Phosphoenolpyruvate carboxylase, bacterial/plant-type	1		(IPR007118) Expansin/Lol pI	1
(IPR043519) Nucleotidyltransferase superfamily	1		(IPR011990) Tetratricopeptide-like helical domain superfamily	1		(IPR001921) Ribosomal protein L7A/L8	2		(IPR011990) Tetratricopeptide-like helical domain superfamily	1		(IPR003945) NADH-plastoquinone oxidoreductase, chain 5	1
(IPR002150) Ribosomal protein L31	1		(IPR035994) Nucleoside phosphorylase superfamily	1		(IPR001380) Ribosomal protein L13e	2		(IPR006043) Nucleobase cation symporter 2 family	1		(IPR044856) Malate synthase, C-terminal superfamily	1
(IPR023591) Ribosomal protein S2, flavodoxin-like domain superfamily	1		(IPR008979) Galactose-binding-like domain superfamily	1		(IPR035984) Acyl-CoA binding protein superfamily	2		(IPR035966) Phosphofructokinase superfamily	1		(IPR023591) Ribosomal protein S2, flavodoxin-like domain superfamily	1
(IPR036838) Ribosomal protein S10 domain superfamily	1		(IPR033309) Crossover junction endonuclease Mus81	1		(IPR002067) Mitochondrial carrier protein	2		(IPR007770) Protein DMP	1		(IPR001457) NADH:ubiquinone/plastoquinone oxidoreductase, chain 6	1
(IPR001457) NADH:ubiquinone/plastoquinone oxidoreductase, chain 6	1		(IPR039265) Putative lipid-transfer protein DIR1-like	1		(IPR016024) Armadillo-type fold	2		(IPR039265) Putative lipid-transfer protein DIR1-like	1		(IPR027534) Ribosomal protein L12/P1/P2 family	1
(IPR027534) Ribosomal protein L12/P1/P2 family	1		(IPR029035) DHS-like NAD/FAD-binding domain superfamily	1		(IPR036786) Ribosome maturation protein SBDS, N-terminal domain superfamily	2		(IPR029035) DHS-like NAD/FAD-binding domain superfamily	1		(IPR044791) Beta-glucanase/XTH	1
(IPR043131) Branched-chain-amino-acid aminotransferase-like, N-terminal	1		(IPR036404) Jacalin-like lectin domain superfamily	1		(IPR008927) 6-phosphogluconate dehydrogenase-like, C-terminal domain superfamily	2		(IPR015915) Kelch-type beta propeller	1		(IPR036390) Winged helix DNA-binding domain superfamily	1
(IPR038716) Ribosomal protein P1/P2, N-terminal domain	1		(IPR042105) Ribosomal protein L31 superfamily	1		(IPR013815) ATP-grasp fold, subdomain 1	2		(IPR003676) Small auxin-up RNA	1		(IPR037033) DNA-directed RNA polymerase, subunit 2, hybrid-binding domain superfamily	1
(IPR004963) Pectinacetylesterase/NOTUM	1		(IPR005706) Ribosomal protein S2, bacteria/mitochondria/plastid	1		(IPR005710) Ribosomal protein S4/S9, eukaryotic/archaeal	2		(IPR027640) Kinesin-like protein	1		(IPR044676) MYB-like transcription factor EOBI/EOBII-like, plant	1
(IPR036390) Winged helix DNA-binding domain superfamily	1		(IPR020831) Glyceraldehyde/Erythrose phosphate dehydrogenase family	1		(IPR000039) Ribosomal protein L18e	2		(IPR013824) DNA topoisomerase, type IA, central region, subdomain 1	1		(IPR011004) Trimeric LpxA-like superfamily	1
(IPR044859) Allene oxide cyclase/Dirigent protein	1		(IPR000558) Histone H2B	1		(IPR036400) Cytochrome b5-like heme/steroid binding domain superfamily	2		(IPR011141) Polyketide synthase, type III	1		(IPR001406) Pseudouridine synthase I, TruA	1
(IPR009000) Translation protein, beta-barrel domain superfamily	1		(IPR044846) Glycoside hydrolase family 10	1		(IPR000490) Glycoside hydrolase family 17	2		(IPR008991) Translation protein SH3-like domain superfamily	1		(IPR005707) Ribosomal protein S2, eukaryotic/archaeal	1
(IPR032710) NTF2-like domain superfamily	1		(IPR029058) Alpha/Beta hydrolase fold	1		(IPR001147) Ribosomal protein L21e	2		(IPR000246) Peptidase T2, asparaginase 2	1		(IPR035984) Acyl-CoA binding protein superfamily	1
(IPR016167) FAD-binding, type PCMH, subdomain 1	1		(IPR006766) Protein EXORDIUM-like	1		(IPR009019) K homology domain superfamily, prokaryotic type	2		(IPR035940) CAP superfamily	1		(IPR026055) Fatty acyl-CoA reductase	1
(IPR005946) Ribose-phosphate pyrophosphokinase	1		(IPR036227) Ribosomal L18e/L15P superfamily	1		(IPR029058) Alpha/Beta hydrolase fold	2		(IPR015500) Peptidase S8, subtilisin-related	1		(IPR003337) Trehalose-phosphatase	1
(IPR001383) Ribosomal protein L28	1		(IPR001902) SLC26A/SulP transporter	1		(IPR002327) Cytochrome c, class IA/ IB	2		(IPR029052) Metallo-dependent phosphatase-like	1		(IPR005795) Major pollen allergen Lol pI	1
(IPR004265) Dirigent protein	1		(IPR044893) RNA polymerase Rpb1, clamp domain superfamily	1		(IPR015943) WD40/YVTN repeat-like-containing domain superfamily	2		(IPR014710) RmlC-like jelly roll fold	1		(IPR036852) Peptidase S8/S53 domain superfamily	1
(IPR000823) Plant peroxidase	1		(IPR023614) Porin domain superfamily	1		(IPR035908) ATP synthase, F0 complex, subunit A superfamily	2		(IPR045084) Transcription factor AIB/MYC-like	1		(IPR036322) WD40-repeat-containing domain superfamily	1
(IPR001362) Glycoside hydrolase, family 32	1		(IPR001592) Potyvirus coat protein	1		(IPR001515) Ribosomal protein L32e	2		(IPR001780) Ribosomal protein L35A	1		(IPR036881) Glycoside hydrolase family 3 C-terminal domain superfamily	1
(IPR032675) Leucine-rich repeat domain superfamily	1					(IPR036823) Ribosomal protein S7 domain superfamily	2		(IPR015943) WD40/YVTN repeat-like-containing domain superfamily	1		(IPR012337) Ribonuclease H-like superfamily	1
(IPR036789) Ribosomal protein L6, alpha-beta domain superfamily	1					(IPR027246) Eukaryotic porin/Tom40	2		(IPR008963) Purple acid phosphatase-like, N-terminal	1		(IPR015712) DNA-directed RNA polymerase, subunit 2	1
(IPR036402) Elongation factor Ts, dimerisation domain superfamily	1					(IPR001047) Ribosomal protein S8e	2		(IPR036872) CH domain superfamily	1		(IPR008158) Protein translocase SEC61 complex, gamma subunit	1
(IPR014722) Ribosomal protein L2, domain 2	1					(IPR001063) Ribosomal protein L22/L17	2		(IPR044785) Rho GTPase-activating protein 1-5	1		(IPR036962) Glycoside hydrolase, family 3, N-terminal domain superfamily	1
(IPR012337) Ribonuclease H-like superfamily	1					(IPR022309) Ribosomal protein S8e/ribosomal biogenesis NSA2	2		(IPR036181) MIT domain superfamily	1		(IPR016024) Armadillo-type fold	1
(IPR001492) Flagellin	1					(IPR039547) 60S ribosomal protein L19	2		(IPR011006) CheY-like superfamily	1		(IPR002113) ADP/ATP carrier protein, eukaryotic type	1
(IPR040442) Pyruvate kinase-like domain superfamily	1					(IPR005721) Ribosomal protein L22/L17, eukaryotic/archaeal	2		(IPR036041) Ribosome-inactivating protein superfamily	1		(IPR014352) FERM/acyl-CoA-binding protein superfamily	1
(IPR011692) Stress up-regulated Nod 19	1					(IPR036282) Glutathione S-transferase, C-terminal domain superfamily	2		(IPR005333) Transcription factor, TCP	1		(IPR010227) NADH-quinone oxidoreductase, chain M/4	1
(IPR036038) Aminotransferase-like, PLP-dependent enzymes	1					(IPR004886) Glucanosyltransferase	2		(IPR044675) E3 ubiquitin-protein ligase RING1-like	1		(IPR001546) GPCR fungal pheromone A receptor	1
(IPR001292) Estrogen receptor	1					(IPR023674) Ribosomal protein L1-like	2		(IPR035979) RNA-binding domain superfamily	1		(IPR000988) Ribosomal protein L24e-related	1
(IPR000077) Ribosomal protein L39e	1					(IPR005823) Ribosomal protein L13, bacterial-type	2		(IPR039331) Purple acid phosphatase-like	1		(IPR011990) Tetratricopeptide-like helical domain superfamily	1
(IPR000054) Ribosomal protein L31e	1					(IPR000883) Cytochrome c oxidase subunit I	2		(IPR012341) Six-hairpin glycosidase-like superfamily	1		(IPR008979) Galactose-binding-like domain superfamily	1
(IPR044658) Transcription factor bHLH92/bHLH041-like	1					(IPR044892) Ribosomal protein L3, domain 3, archaeal type superfamily	2		(IPR015633) E2F Family	1		(IPR036812) NADP-dependent oxidoreductase domain superfamily	1
(IPR005093) RNA-directed RNA polymerase beta-chain	1					(IPR006995) ATP synthase, F0 complex, subunit J	2		(IPR013758) DNA topoisomerase, type IIA, subunit A/ C-terminal, alpha-beta	1		(IPR023296) Glycosyl hydrolase, five-bladed beta-propellor domain superfamily	1
(IPR027387) Cytochrome b/b6-like domain superfamily	1					(IPR002675) Ribosomal protein L38e	2		(IPR036282) Glutathione S-transferase, C-terminal domain superfamily	1		(IPR002922) Thiazole biosynthetic enzyme Thi4 family	1
(IPR001816) Translation elongation factor EFTs/EF1B	1					(IPR006254) Isocitrate lyase	2		(IPR001360) Glycoside hydrolase family 1	1		(IPR038430) NADH:ubiquinone oxidoreductase, subunit 3 superfamily	1
(IPR035994) Nucleoside phosphorylase superfamily	1					(IPR038716) Ribosomal protein P1/P2, N-terminal domain	2		(IPR038661) Ribosomal protein L35A superfamily	1		(IPR003440) Glycosyl transferase, family 48	1
(IPR035104) Ribosomal protein S1-like	1					(IPR005819) Linker histone H1/H5	2		(IPR036869) Chaperone J-domain superfamily	1		(IPR045114) Csn12 family	1
(IPR011076) Malate synthase superfamily	1					(IPR001564) Nucleoside diphosphate kinase	2		(IPR044986) Kinesin-like protein KIF15/KIN-12E	1		(IPR006172) DNA-directed DNA polymerase, family B	1
(IPR005519) Acid phosphatase, class B-like	1					(IPR020100) Glucose-repressible protein Grg1	2		(IPR001344) Chlorophyll A-B binding protein, plant and chromista	1		(IPR006252) Malate synthase A	1
(IPR026042) Stress response protein YjbJ	1					(IPR032675) Leucine-rich repeat domain superfamily	2		(IPR013759) DNA topoisomerase, type IIA, subunit B, C-terminal	1		(IPR022709) Protein SCAI	1
(IPR023296) Glycosyl hydrolase, five-bladed beta-propellor domain superfamily	1					(IPR008972) Cupredoxin	2		(IPR029063) S-adenosyl-L-methionine-dependent methyltransferase	1		(IPR039391) Phytocyanin	1
(IPR015806) Pyruvate kinase, insert domain superfamily	1					(IPR016177) DNA-binding domain superfamily	2		(IPR036388) Winged helix-like DNA-binding domain superfamily	1		(IPR017438) Inorganic polyphosphate/ATP-NAD kinase, N-terminal	1
(IPR022941) Signal recognition particle, SRP54 subunit	1					(IPR038551) Ribosomal protein S26e superfamily	2		(IPR036691) Endonuclease/exonuclease/phosphatase superfamily	1		(IPR039638) Mediator of RNA polymerase II transcription subunit 33A/B	1
(IPR005706) Ribosomal protein S2, bacteria/mitochondria/plastid	1					(IPR035970) Ribosomal protein L19/L19e superfamily	2		(IPR012677) Nucleotide-binding alpha-beta plait domain superfamily	1		(IPR040376) At4g28100-like	1
(IPR043425) NusG-like	1					(IPR036629) YjbJ superfamily	2		(IPR043151) Bromo adjacent homology (BAH) domain superfamily	1		(IPR014710) RmlC-like jelly roll fold	1
(IPR010255) Haem peroxidase superfamily	1					(IPR027387) Cytochrome b/b6-like domain superfamily	2		(IPR044293) Transcription factor PRE	1		(IPR016064) NAD kinase/diacylglycerol kinase-like domain superfamily	1
(IPR015926) Cytolysin/lectin	1					(IPR015876) Acyl-CoA desaturase	2		(IPR009091) Regulator of chromosome condensation 1/beta-lactamase-inhibitor protein II	1		(IPR013833) Cytochrome c oxidase, subunit III, 4-helical bundle	1
(IPR000558) Histone H2B	1					(IPR036796) Ribosomal protein L11/L12, N-terminal domain superfamily	2		(IPR022234) Protein of unknown function DUF3759	1		(IPR015943) WD40/YVTN repeat-like-containing domain superfamily	1
(IPR044846) Glycoside hydrolase family 10	1					(IPR002129) Pyridoxal phosphate-dependent decarboxylase	2		(IPR001701) Glycoside hydrolase family 9	1		(IPR035973) Cytochrome c oxidase subunit III-like superfamily	1
(IPR008991) Translation protein SH3-like domain superfamily	1					(IPR010829) Cerato-platanin	2		(IPR044779) SS18 family	1		(IPR035908) ATP synthase, F0 complex, subunit A superfamily	1
(IPR006252) Malate synthase A	1					(IPR035987) Ribosomal protein S8 superfamily	2		(IPR039300) Protein JASON	1		(IPR045000) Tropinone reductase	1
(IPR008949) Isoprenoid synthase domain superfamily	1					(IPR023407) Ribosomal protein S27, zinc-binding domain superfamily	2		(IPR012340) Nucleic acid-binding, OB-fold	1		(IPR011050) Pectin lyase fold/virulence factor	1
(IPR023626) Ribosomal protein L39e domain superfamily	1					(IPR001593) Ribosomal protein S3Ae	2		(IPR032710) NTF2-like domain superfamily	1		(IPR024791) Cytochrome c oxidase subunit III	1
(IPR043136) B30.2/SPRY domain superfamily	1					(IPR039660) Ribosomal protein L14	2		(IPR031834) Antitoxin RnlB/LsoB	1		(IPR011006) CheY-like superfamily	1
(IPR029057) Phosphoribosyltransferase-like	1					(IPR036643) DNA-directed RNA polymerase, insert domain superfamily	2		(IPR005819) Linker histone H1/H5	1		(IPR016162) Aldehyde dehydrogenase, N-terminal	1
(IPR036288) Aconitase B, HEAT-like domain superfamily	1					(IPR036909) Cytochrome c-like domain superfamily	2		(IPR044961) Tetratricopeptide repeat protein POLLENLESS 3/SULFUR DEFICIENCY-INDUCED 1	1		(IPR000568) ATP synthase, F0 complex, subunit A	1
(IPR036640) ABC transporter type 1, transmembrane domain superfamily	1					(IPR023346) Lysozyme-like domain superfamily	2		(IPR038843) Cell wall protein Sed1/Spi1	1		(IPR000407) Nucleoside phosphatase GDA1/CD39	1
(IPR005001) RNA-binding protein Hfq	1					(IPR004000) Actin family	2		(IPR045034) O-acyltransferase WSD1-like	1		(IPR004312) Arabidopsis retrotransposon Orf1	1
(IPR001859) Trypanosoma cruzi ribosomal protein P2-like	1					(IPR007250) Heat shock protein 9/12	2		(IPR007157) PspA/IM30	1		(IPR036749) Expansin, cellulose-binding-like domain superfamily	1
(IPR023933) Glycoside hydrolase, family 2, beta-galactosidase	1					(IPR011051) RmlC-like cupin domain superfamily	2		(IPR009424) Arabinogalactan protein 16/20/22/41	1		(IPR000941) Enolase	1
(IPR039896) Protein Red-like	1					(IPR045077) Ribosomal protein L3, archaeal/eukaryotic type	2		(IPR014722) Ribosomal protein L2, domain 2	1		(IPR037607) Diacylglycerol kinase	1
(IPR001848) Ribosomal protein S10	1					(IPR036948) Ribosomal protein L21 superfamily	2		(IPR017989) Ribosome-inactivating protein type 1/2	1		(IPR035979) RNA-binding domain superfamily	1
(IPR012820) Sucrose synthase, plant/cyanobacteria	1					(IPR002673) Ribosomal protein L29e	2		(IPR036965) Terpene synthase, N-terminal domain superfamily	1		(IPR036250) Acyl-CoA dehydrogenase-like, C-terminal	1
(IPR002453) Beta tubulin	1					(IPR023591) Ribosomal protein S2, flavodoxin-like domain superfamily	2		(IPR023405) DNA topoisomerase, type IA, core domain	1		(IPR016161) Aldehyde/histidinol dehydrogenase	1
(IPR013833) Cytochrome c oxidase, subunit III, 4-helical bundle	1					(IPR001383) Ribosomal protein L28	2		(IPR036936) CRIB domain superfamily	1		(IPR002401) Cytochrome P450, E-class, group I	1
(IPR035973) Cytochrome c oxidase subunit III-like superfamily	1					(IPR036850) Nucleoside diphosphate kinase-like domain superfamily	2		(IPR011008) Dimeric alpha-beta barrel	1		(IPR040115) Lunapark family	1
(IPR036510) Ribosomal protein S20 superfamily	1					(IPR002674) Ribosomal protein L37ae	2		(IPR002347) Short-chain dehydrogenase/reductase SDR	1		(IPR023621) Ribosomal protein L31e domain superfamily	1
(IPR008686) RNA-dependent RNA polymerase, mitoviral	1					(IPR036322) WD40-repeat-containing domain superfamily	2		(IPR036875) Zinc finger, CCHC-type superfamily	1		(IPR001865) Ribosomal protein S2	1
(IPR001465) Malate synthase	1					(IPR043504) Peptidase S1, PA clan, chymotrypsin-like fold	2		(IPR008004) Protein OCTOPUS-like	1		(IPR012876) Protein of unknown function DUF1677, plant	1
						(IPR015712) DNA-directed RNA polymerase, subunit 2	2		(IPR000778) Cytochrome b245, heavy chain	1		(IPR044788) Carbohydrate-binding X8 domain-containing protein, plant	1
						(IPR005756) Ribosomal protein L26/L24, eukaryotic/archaeal	2		(IPR036922) Rieske [2Fe-2S] iron-sulphur domain superfamily	1		(IPR036282) Glutathione S-transferase, C-terminal domain superfamily	1
						(IPR014352) FERM/acyl-CoA-binding protein superfamily	2		(IPR031100) LOG family	1		(IPR037104) Annexin superfamily	1
						(IPR000988) Ribosomal protein L24e-related	2		(IPR036277) SMCs flexible hinge superfamily	1		(IPR036345) Exoribonuclease, PH domain 2 superfamily	1
						(IPR011990) Tetratricopeptide-like helical domain superfamily	2		(IPR033309) Crossover junction endonuclease Mus81	1		(IPR000268) DNA-directed RNA polymerase, subunit N/Rpb10	1
						(IPR023201) SecY domain superfamily	2		(IPR039261) Ferredoxin-NADP reductase (FNR), nucleotide-binding domain	1		(IPR029006) ADF-H/Gelsolin-like domain superfamily	1
						(IPR005519) Acid phosphatase, class B-like	2		(IPR036404) Jacalin-like lectin domain superfamily	1		(IPR036908) RlpA-like domain superfamily	1
						(IPR037019) Glycoside hydrolase family 7, catalytic domain superfamily	2		(IPR029071) Ubiquitin-like domain superfamily	1		(IPR011989) Armadillo-like helical	1
						(IPR001806) Small GTPase	2		(IPR044601) 3xHMG-box protein HMGB6/HMGB13	1		(IPR023214) HAD superfamily	1
						(IPR042308) Helper-component proteinase (HC-Pro) cysteine protease (CPD) domain superfamily	2		(IPR038718) SNF2-like, N-terminal domain superfamily	1		(IPR015424) Pyridoxal phosphate-dependent transferase	1
						(IPR000235) Ribosomal protein S5/S7	2		(IPR024681) Ribulose bisphosphate carboxylase, small subunit	1		(IPR036150) Cytochrome b/b6, C-terminal domain superfamily	1
						(IPR014710) RmlC-like jelly roll fold	2		(IPR006968) Root UVB sensitive family	1		(IPR038765) Papain-like cysteine peptidase superfamily	1
						(IPR000630) Ribosomal protein S8	2		(IPR036514) SGNH hydrolase superfamily	1		(IPR011332) Zinc-binding ribosomal protein	1
						(IPR013833) Cytochrome c oxidase, subunit III, 4-helical bundle	2		(IPR022816) Condensin complex subunit 2/barren	1		(IPR000883) Cytochrome c oxidase subunit I	1
						(IPR035973) Cytochrome c oxidase subunit III-like superfamily	2		(IPR004508) Thioredoxin-independent 5'-adenylylsulphate reductase	1		(IPR016039) Thiolase-like	1
						(IPR009068) S15/NS1, RNA-binding	2		(IPR012864) Cysteine oxygenase/2-aminoethanethiol dioxygenase	1		(IPR044830) Class III homeodomain-leucine zipper family	1
						(IPR024791) Cytochrome c oxidase subunit III	2		(IPR045051) Subtilisin-like protease	1		(IPR000533) Tropomyosin	1
						(IPR000568) ATP synthase, F0 complex, subunit A	2		(IPR029055) Nucleophile aminohydrolases, N-terminal	1		(IPR044810) WRKY transcription factor, plant	1
						(IPR000876) Ribosomal protein S4e	2		(IPR029056) Ribokinase-like	1		(IPR001563) Peptidase S10, serine carboxypeptidase	1
						(IPR001865) Ribosomal protein S2	2		(IPR040211) Small EDRK-rich factor 1/2	1		(IPR045019) Beta-carotene hydroxylase-like	1
						(IPR001377) Ribosomal protein S6e	2		(IPR016025) Clathrin heavy chain, N-terminal	1		(IPR044792) Protein TAR1	1
						(IPR036919) Ribosomal protein L30, ferredoxin-like fold domain superfamily	2		(IPR002028) Tryptophan synthase, alpha chain	1		(IPR042106) NADH-ubiquinone/plastoquinone oxidoreductase chain 6, subunit NuoJ	1
						(IPR016135) Ubiquitin-conjugating enzyme/RWD-like	2		(IPR005150) Cellulose synthase	1		(IPR001951) Histone H4	1
						(IPR027493) Ribosomal protein L31 type B	2					(IPR020095) Pseudouridine synthase I, TruA, C-terminal	1
						(IPR011989) Armadillo-like helical	2					(IPR038933) Ovate protein family	1
						(IPR038464) Ribosomal protein L38e superfamily	2					(IPR012334) Pectin lyase fold	1
						(IPR005704) Ribosomal protein S3, bacterial-type	2					(IPR011905) Glutaredoxin-like, plant II	1
						(IPR036150) Cytochrome b/b6, C-terminal domain superfamily	2					(IPR004813) Oligopeptide transporter, OPT superfamily	1
						(IPR016035) Acyl transferase/acyl hydrolase/lysophospholipase	2					(IPR012677) Nucleotide-binding alpha-beta plait domain superfamily	1
						(IPR036394) Ribosomal protein L22/L17 superfamily	2					(IPR044169) Protein PYRICULARIA ORYZAE RESISTANCE 21	1
						(IPR029063) S-adenosyl-L-methionine-dependent methyltransferase	2					(IPR008803) RHD3/Sey1	1
						(IPR039699) Ribosomal protein L7/L30	2					(IPR001499) GPCR fungal pheromone mating factor, STE3	1
						(IPR012677) Nucleotide-binding alpha-beta plait domain superfamily	2					(IPR043131) Branched-chain-amino-acid aminotransferase-like, N-terminal	1
						(IPR011773) DNA-directed RNA polymerase, alpha subunit	2					(IPR038716) Ribosomal protein P1/P2, N-terminal domain	1
						(IPR005874) Eukaryotic translation initiation factor SUI1	2					(IPR023211) DNA polymerase, palm domain superfamily	1
						(IPR039109) Ribosomal protein L30/YlxQ	2					(IPR012340) Nucleic acid-binding, OB-fold	1
						(IPR005998) Ribosomal protein L7, eukaryotic	2					(IPR036849) Enolase-like, C-terminal domain superfamily	1
						(IPR001722) Glycoside hydrolase, family 7	2					(IPR000277) Cys/Met metabolism, pyridoxal phosphate-dependent enzyme	1
						(IPR019927) Ribosomal protein L3, bacterial/organelle-type	2					(IPR037120) Haem peroxidase domain superfamily, animal type	1
						(IPR005093) RNA-directed RNA polymerase beta-chain	2					(IPR036236) Zinc finger C2H2 superfamily	1
						(IPR036351) Ribosomal protein L32e superfamily	2					(IPR038582) S27a-like superfamily	1
						(IPR011032) GroES-like superfamily	2					(IPR020103) Pseudouridine synthase, catalytic domain superfamily	1
						(IPR011331) Ribosomal protein L37ae/L37e	2					(IPR035901) GIY-YIG endonuclease superfamily	1
						(IPR035104) Ribosomal protein S1-like	2					(IPR019182) Cytochrome b-c1 complex subunit 10, fungi	1
						(IPR001976) Ribosomal protein S24e	2					(IPR039109) Ribosomal protein L30/YlxQ	1
						(IPR045083) ATP synthase, F0 complex, subunit A, bacterial/mitochondria	2					(IPR039543) Lipid-binding protein POX18/UbiT/NSL-TP1	1
						(IPR001456) Helper component proteinase	2					(IPR036412) HAD-like superfamily	1
						(IPR044076) Ribosomal protein P2	2					(IPR003918) NADH:ubiquinone oxidoreductase	1
						(IPR000592) Ribosomal protein S27	2					(IPR027495) Thiamine thiazole synthase	1
						(IPR016641) Nascent polypeptide-associated complex subunit alpha	2					(IPR001388) Synaptobrevin	1
						(IPR004977) Ribosomal protein S25	2					(IPR036038) Aminotransferase-like, PLP-dependent enzymes	1
						(IPR009003) Peptidase S1, PA clan	2					(IPR000054) Ribosomal protein L31e	1
						(IPR000911) Ribosomal protein L11/L12	2					(IPR035810) Phosphatidylethanolamine-binding protein, eukaryotic	1
						(IPR014401) Ribosomal protein S6, eukaryotic	1					(IPR036610) PEBP-like superfamily	1
						(IPR000669) Mannitol dehydrogenase	1					(IPR044808) Ethylene-responsive transcription factor	1
						(IPR000530) Ribosomal protein S12e	1					(IPR027387) Cytochrome b/b6-like domain superfamily	1
						(IPR041854) BFD-like [2Fe-2S]-binding domain superfamily	1					(IPR011032) GroES-like superfamily	1
						(IPR006350) Intron endonuclease, group I	1					(IPR008217) Ccc1 family	1
						(IPR036791) Ribosomal protein L9, C-terminal domain superfamily	1					(IPR008698) NADH dehydrogenase [ubiquinone] 1 beta subcomplex subunit 7, NDUB7	1
						(IPR002143) Ribosomal protein L1	1					(IPR027408) PNPase/RNase PH domain superfamily	1
						(IPR036621) Anticodon-binding domain superfamily	1					(IPR011076) Malate synthase superfamily	1
						(IPR025543) Dodecin-like	1					(IPR025886) Phloem protein 2-like	1
						(IPR005593) Xylulose 5-phosphate/Fructose 6-phosphate phosphoketolase	1					(IPR023580) RNA polymerase subunit RPB10	1
						(IPR044992) Glutamine amidotransferase domain containing protein ChyE-like	1					(IPR008914) Phosphatidylethanolamine-binding protein	1
						(IPR009760) Protein of unknown function DUF1328	1					(IPR045083) ATP synthase, F0 complex, subunit A, bacterial/mitochondria	1
						(IPR010279) Inner membrane protein YqjD/ElaB	1					(IPR044974) Disease resistance protein, plants	1
						(IPR002164) Nucleosome assembly protein (NAP)	1					(IPR029005) LIM-domain binding protein/SEUSS	1
						(IPR002452) Alpha tubulin	1					(IPR019560) Mitochondrial 18kDa protein	1
						(IPR010096) NAD(P)H-quinone oxidoreductase, subunit N/subunit 2	1					(IPR001901) Protein translocase complex, SecE/Sec61-gamma subunit	1
						(IPR036920) Ribosomal protein L10e/L16 superfamily	1					(IPR035921) F/V-ATP synthase subunit C superfamily	1
						(IPR036188) FAD/NAD(P)-binding domain superfamily	1					(IPR000440) NADH:ubiquinone/plastoquinone oxidoreductase, chain 3	1
						(IPR045010) Medium-chain dehydrogenase/reductase	1					(IPR004326) Mlo-related protein	1
						(IPR036312) Bifunctional inhibitor/plant lipid transfer protein/seed storage helical domain superfamily	1					(IPR039616) CLAVATA3/ESR (CLE)-related protein 1/3/4	1
						(IPR001684) Ribosomal protein L27	1					(IPR044651) Trehalose 6-phosphate OTSB-like	1
						(IPR036101) CarD-like/TRCF domain superfamily	1					(IPR016444) Synaptobrevin/Vesicle-associated membrane protein	1
						(IPR036401) Ribosomal protein S17e-like superfamily	1					(IPR027949) Petal formation-expressed	1
						(IPR004202) Cytochrome c oxidase subunit VIIc	1					(IPR000164) Histone H3/CENP-A	1
						(IPR001775) GspD/PilQ family	1					(IPR004977) Ribosomal protein S25	1
						(IPR005709) Ribosomal protein S4, bacterial-type	1					(IPR044993) Beta-D-xylosidase	1
						(IPR000889) Glutathione peroxidase	1					(IPR023299) P-type ATPase, cytoplasmic domain N	1
						(IPR003772) Large ribosomal RNA subunit accumulation protein YceD	1					(IPR019791) Haem peroxidase, animal-type	1
						(IPR042097) Aminopeptidase N-like , N-terminal	1					(IPR024097) Basic helix-loop-helix leucine zipper transcription factor	1
						(IPR000266) Ribosomal protein S17/S11	1					(IPR005888) dTDP-glucose 4,6-dehydratase	1
						(IPR040079) Glutathione Transferase family	1					(IPR045051) Subtilisin-like protease	1
						(IPR009030) Growth factor receptor cysteine-rich domain superfamily	1					(IPR001465) Malate synthase	1
						(IPR023123) Tubulin, C-terminal	1
						(IPR001283) Cysteine-rich secretory protein-related	1
						(IPR029062) Class I glutamine amidotransferase-like	1
						(IPR017938) Riboflavin synthase-like beta-barrel	1
						(IPR003480) Transferase	1
						(IPR044856) Malate synthase, C-terminal superfamily	1
						(IPR013783) Immunoglobulin-like fold	1
						(IPR021109) Aspartic peptidase domain superfamily	1
						(IPR027179) Mature-T-Cell Proliferation I type	1
						(IPR027304) Trigger factor/SurA domain superfamily	1
						(IPR001082) Fimbrial protein pilin	1
						(IPR038655) Ribosomal protein L27e superfamily	1
						(IPR000289) Ribosomal protein S28e	1
						(IPR000915) 60S ribosomal protein L6E	1
						(IPR029047) Heat shock protein 70kD, peptide-binding domain superfamily	1
						(IPR027443) Isopenicillin N synthase-like superfamily	1
						(IPR036804) Chemotaxis receptor methyltransferase CheR, N-terminal domain superfamily	1
						(IPR004265) Dirigent protein	1
						(IPR002041) Ran GTPase	1
						(IPR005707) Ribosomal protein S2, eukaryotic/archaeal	1
						(IPR003718) OsmC/Ohr family	1
						(IPR042189) Sigma-70 factor, region 1.1 superfamily	1
						(IPR045073) Glutathione S-transferase Omega/Tau-like	1
						(IPR012337) Ribonuclease H-like superfamily	1
						(IPR029028) Alpha/beta knot methyltransferases	1
						(IPR006721) ATP synthase, F1 complex, epsilon subunit, mitochondrial	1
						(IPR004242) Transposon, En/Spm-like	1
						(IPR002671) Ribosomal protein L22e	1
						(IPR039131) Complex I intermediate-associated protein 30, mitochondrial	1
						(IPR036102) OsmC/Ohr superfamily	1
						(IPR036049) Ribosomal protein L29/L35 superfamily	1
						(IPR036771) F0F1 ATP synthase delta/epsilon subunit, N-terminal	1
						(IPR030509) Casein kinase I	1
						(IPR006808) ATP synthase, F0 complex, subunit G, mitochondrial	1
						(IPR041752) Cytochrome c oxidase assembly factor 3, mitochondrial	1
						(IPR013035) Phosphoenolpyruvate carboxykinase, C-terminal	1
						(IPR019711) ATP synthase, F0 complex, subunit H	1
						(IPR035516) DNA gyrase/topoisomerase IV, subunit A, C-terminal	1
						(IPR020594) Ribosomal protein L9, bacteria/chloroplast	1
						(IPR019904) Peroxiredoxin OsmC	1
						(IPR026042) Stress response protein YjbJ	1
						(IPR029061) Thiamin diphosphate-binding fold	1
						(IPR023296) Glycosyl hydrolase, five-bladed beta-propellor domain superfamily	1
						(IPR038903) Allergen Asp f 4	1
						(IPR020568) Ribosomal protein S5 domain 2-type fold	1
						(IPR039265) Putative lipid-transfer protein DIR1-like	1
						(IPR002213) UDP-glucuronosyl/UDP-glucosyltransferase	1
						(IPR003440) Glycosyl transferase, family 48	1
						(IPR020831) Glyceraldehyde/Erythrose phosphate dehydrogenase family	1
						(IPR010977) Aromatic-L-amino-acid decarboxylase	1
						(IPR015157) Translation machinery associated TMA7	1
						(IPR006846) Ribosomal protein S30	1
						(IPR005729) Ribosomal protein S10, eukaryotic/archaeal	1
						(IPR011141) Polyketide synthase, type III	1
						(IPR036639) Cytochrome c oxidase subunit IV superfamily	1
						(IPR009346) GRIM-19	1
						(IPR014746) Glutamine synthetase/guanido kinase, catalytic domain	1
						(IPR005299) SAM dependent carboxyl methyltransferase	1
						(IPR023626) Ribosomal protein L39e domain superfamily	1
						(IPR005755) Ribosomal protein L13, eukaryotic/archaeal	1
						(IPR035940) CAP superfamily	1
						(IPR018163) Threonyl/alanyl tRNA synthetase, class II-like, putative editing domain superfamily	1
						(IPR004846) Type II/III secretion system	1
						(IPR000796) Aspartate/other aminotransferase	1
						(IPR001859) Trypanosoma cruzi ribosomal protein P2-like	1
						(IPR002042) Uricase	1
						(IPR036510) Ribosomal protein S20 superfamily	1
						(IPR008963) Purple acid phosphatase-like, N-terminal	1
						(IPR038579) Ribosomal protein S21e superfamily	1
						(IPR036636) Cytochrome c oxidase subunit VIIc superfamily	1
						(IPR045059) 60S ribosomal protein L35	1
						(IPR036967) Ribosomal protein S11 superfamily	1
						(IPR016162) Aldehyde dehydrogenase, N-terminal	1
						(IPR036605) Mago nashi superfamily	1
						(IPR000509) Ribosomal protein L36e	1
						(IPR016032) Signal transduction response regulator, C-terminal effector	1
						(IPR001227) Acyl transferase domain superfamily	1
						(IPR020471) Aldo-keto reductase	1
						(IPR024706) Peroxiredoxin, AhpC-type	1
						(IPR008280) Tubulin/FtsZ, C-terminal	1
						(IPR027434) Homing endonuclease	1
						(IPR031755) Peptidase inhibitor I66	1
						(IPR036065) BolA-like superfamily	1
						(IPR016161) Aldehyde/histidinol dehydrogenase	1
						(IPR023621) Ribosomal protein L31e domain superfamily	1
						(IPR012341) Six-hairpin glycosidase-like superfamily	1
						(IPR021308) Group 4 capsule polysaccharide formation lipoprotein GfcB	1
						(IPR011992) EF-hand domain pair	1
						(IPR001360) Glycoside hydrolase family 1	1
						(IPR011993) PH-like domain superfamily	1
						(IPR011330) Glycoside hydrolase/deacetylase, beta/alpha-barrel	1
						(IPR024794) Ribosomal protein L15e core domain superfamily	1
						(IPR028945) Get1 family	1
						(IPR022973) Ribosomal protein L10	1
						(IPR036969) Citrate synthase superfamily	1
						(IPR001563) Peptidase S10, serine carboxypeptidase	1
						(IPR023373) YmcC-like superfamily	1
						(IPR000307) Ribosomal protein S16	1
						(IPR024079) Metallopeptidase, catalytic domain superfamily	1
						(IPR009027) Ribosomal protein L9/RNase H1, N-terminal	1
						(IPR031830) Uncharacterised protein YdiH	1
						(IPR038071) UROD/MetE-like superfamily	1
						(IPR009078) Ferritin-like superfamily	1
						(IPR009061) Putative DNA-binding domain superfamily	1
						(IPR036457) PPM-type phosphatase domain superfamily	1
						(IPR001701) Glycoside hydrolase family 9	1
						(IPR023067) DNA protection during starvation protein, gammaproteobacteria	1
						(IPR005809) Succinate--CoA synthetase, beta subunit	1
						(IPR008514) Type VI secretion system effector Hcp	1
						(IPR034706) Cell division coordinator CpoB	1
						(IPR036849) Enolase-like, C-terminal domain superfamily	1
						(IPR044961) Tetratricopeptide repeat protein POLLENLESS 3/SULFUR DEFICIENCY-INDUCED 1	1
						(IPR023574) Ribosomal protein L4 domain superfamily	1
						(IPR002020) Citrate synthase	1
						(IPR012621) Mitochondrial import receptor subunit TOM7	1
						(IPR035901) GIY-YIG endonuclease superfamily	1
						(IPR036275) YdgH-like superfamily	1
						(IPR023803) Ribosomal protein S16 domain superfamily	1
						(IPR044149) Nitrilase/Cyanide hydratase	1
						(IPR036412) HAD-like superfamily	1
						(IPR016142) Citrate synthase-like, large alpha subdomain	1
						(IPR040153) Respiratory supercomplex factor 2, mitochondrial	1
						(IPR036965) Terpene synthase, N-terminal domain superfamily	1
						(IPR012292) Globin/Protoglobin	1
						(IPR000054) Ribosomal protein L31e	1
						(IPR014756) Immunoglobulin E-set	1
						(IPR036651) Glutamine synthetase, N-terminal domain superfamily	1
						(IPR044808) Ethylene-responsive transcription factor	1
						(IPR012675) Beta-grasp domain superfamily	1
						(IPR015655) Protein phosphatase 2C family	1
						(IPR036544) Cytochrome b-c1 complex subunit 7 superfamily	1
						(IPR036434) 1, 4-beta cellobiohydrolase superfamily	1
						(IPR004023) Mago nashi protein	1
						(IPR000675) Cutinase/acetylxylan esterase	1
						(IPR036565) Mur-like, catalytic domain superfamily	1
						(IPR011076) Malate synthase superfamily	1
						(IPR000612) Proteolipid membrane potential modulator	1
						(IPR001931) Ribosomal protein S21e	1
						(IPR041756) Peptidase M28, SGAP-like	1
						(IPR016288) 1, 4-beta cellobiohydrolase	1
						(IPR043425) NusG-like	1
						(IPR014721) Ribosomal protein S5 domain 2-type fold, subgroup	1
						(IPR014403) Vegetative storage protein/acid phosphatase	1
						(IPR037188) Ribosome maturation protein Sdo1/SBDS, central domain superfamily	1
						(IPR010269) Type VI secretion system TssC-like	1
						(IPR038526) Ribosomal protein L22e superfamily	1
						(IPR001694) NADH:ubiquinone oxidoreductase, subunit 1/F420H2 oxidoreductase subunit H	1
						(IPR003197) Cytochrome b-c1 complex subunit 7	1
						(IPR011344) Single-stranded DNA-binding protein	1
						(IPR005888) dTDP-glucose 4,6-dehydratase	1
						(IPR029055) Nucleophile aminohydrolases, N-terminal	1
						(IPR029056) Ribokinase-like	1
						(IPR000244) Ribosomal protein L9	1
						(IPR001568) Ribonuclease T2-like	1
						(IPR027491) Ribosomal protein L31 type A	1
						(IPR016025) Clathrin heavy chain, N-terminal	1
						(IPR002028) Tryptophan synthase, alpha chain	1
						(IPR036736) ACP-like superfamily	1
						(IPR005150) Cellulose synthase	1
						(IPR002177) DNA-binding protein Dps	1
						(IPR001787) Ribosomal protein L21	1
						(IPR001929) Germin	1
						(IPR001645) Folylpolyglutamate synthetase	1
						(IPR030670) 60S acidic ribosomal protein P0	1
						(IPR003855) Potassium transporter	1
						(IPR039370) Transcription factor BTF3	1
						(IPR028356) UDP-glucose 6-dehydrogenase, eukaryotic type	1
						(IPR018466) Kre9/Knh1 family	1
						(IPR012779) Peptidase M1, alanyl aminopeptidase	1
						(IPR009069) Cysteine alpha-hairpin motif superfamily	1
						(IPR001705) Ribosomal protein L33	1
						(IPR008195) Ribosomal protein L34Ae	1
						(IPR019906) Ribosomal protein L6, bacterial-type	1
						(IPR004268) Peptidoglycan biosynthesis protein MurJ	1
						(IPR022217) Protease inhibitor I10, marinostatin	1
						(IPR010920) LSM domain superfamily	1
						(IPR036735) NusG, N-terminal domain superfamily	1
						(IPR012392) Very-long-chain 3-ketoacyl-CoA synthase	1
						(IPR039876) 28kDa heat- and acid-stable phosphoprotein	1
						(IPR001253) Translation initiation factor 1A (eIF-1A)	1
						(IPR044523) RING domain-containing protein NIP1/2-like	1
						(IPR038097) Ribosomal protein L36e domain superfamily	1
						(IPR023950) Flavohemoprotein	1
						(IPR001266) Ribosomal protein S19e	1
						(IPR001210) Ribosomal protein S17e	1
						(IPR002583) Ribosomal protein S20	1
						(IPR044677) Mitochondrial phosphate carrier protein Pic2/Mir1-like	1
						(IPR011060) Ribulose-phosphate binding barrel	1
						(IPR036649) Inorganic pyrophosphatase superfamily	1
						(IPR036941) Receptor L-domain superfamily	1
						(IPR036594) Methionine synthase domain	1
						(IPR001461) Aspartic peptidase A1 family	1
						(IPR036430) Ribonuclease T2-like superfamily	1
						(IPR036567) Ribosome hibernation promotion factor-like	1
						(IPR027500) 40S ribosomal protein S1/3, eukaryotes	1
						(IPR002208) SecY/SEC61-alpha family	1
						(IPR000271) Ribosomal protein L34	1
						(IPR005485) Ribosomal protein L5 eukaryotic/L18 archaeal	1
						(IPR008928) Six-hairpin glycosidase superfamily	1
						(IPR016102) Succinyl-CoA synthetase-like	1
						(IPR039100) Ribosome maturation protein Sdo1/SBDS-like	1
						(IPR044859) Allene oxide cyclase/Dirigent protein	1
						(IPR036314) Manganese/iron superoxide dismutase, C-terminal domain superfamily	1
						(IPR036164) L21-like superfamily	1
						(IPR037033) DNA-directed RNA polymerase, subunit 2, hybrid-binding domain superfamily	1
						(IPR005556) SUN family	1
						(IPR001469) ATP synthase, F1 complex, delta/epsilon subunit	1
						(IPR002634) BolA protein	1
						(IPR012132) Glucose-methanol-choline oxidoreductase	1
						(IPR029044) Nucleotide-diphospho-sugar transferases	1
						(IPR036852) Peptidase S8/S53 domain superfamily	1
						(IPR036853) Ribosomal protein L14 superfamily	1
						(IPR006710) Glycoside hydrolase, family 43	1
						(IPR036378) FAS1 domain superfamily	1
						(IPR006032) Ribosomal protein S12/S23	1
						(IPR036890) Histidine kinase/HSP90-like ATPase superfamily	1
						(IPR005878) Ribosomal protein L1, bacterial-type	1
						(IPR008162) Inorganic pyrophosphatase	1
						(IPR027477) Succinate dehydrogenase/fumarate reductase flavoprotein, catalytic domain superfamily	1
						(IPR001404) Heat shock protein Hsp90 family	1
						(IPR010530) NADH-ubiquinone reductase complex 1 MLRQ subunit	1
						(IPR013321) Arc-type ribbon-helix-helix	1
						(IPR039124) Fungal antigen PRA1-like	1
						(IPR002696) Putative membrane protein insertion efficiency factor	1
						(IPR010028) Acid phosphatase, plant	1
						(IPR008979) Galactose-binding-like domain superfamily	1
						(IPR002140) Ribosome maturation protein Sdo1/SBDS	1
						(IPR036812) NADP-dependent oxidoreductase domain superfamily	1
						(IPR029514) Aminopeptidase Y	1
						(IPR016095) Ribosomal protein L1, 3-layer alpha/beta-sandwich	1
						(IPR003676) Small auxin-up RNA	1
						(IPR036742) ATP synthase, F1 complex, epsilon subunit superfamily, mitochondrial	1
						(IPR015760) Translation initiation factor IF- 2	1
						(IPR006252) Malate synthase A	1
						(IPR008949) Isoprenoid synthase domain superfamily	1
						(IPR005290) Ribosomal protein S15, bacterial-type	1
						(IPR037103) Tubulin/FtsZ-like, C-terminal domain	1
						(IPR000439) Ribosomal protein L15e	1
						(IPR015500) Peptidase S8, subtilisin-related	1
						(IPR037041) Trigger factor, C-terminal domain superfamily	1
						(IPR029052) Metallo-dependent phosphatase-like	1
						(IPR045084) Transcription factor AIB/MYC-like	1
						(IPR021135) Phosphoenolpyruvate carboxylase	1
						(IPR039420) Transcriptional regulatory protein WalR-like	1
						(IPR014724) RNA polymerase Rpb2, OB-fold	1
						(IPR001592) Potyvirus coat protein	1
						(IPR037231) NAP-like superfamily	1
						(IPR013328) 6-phosphogluconate dehydrogenase, domain 2	1
						(IPR029026) tRNA (guanine-N1-)-methyltransferase, N-terminal	1
						(IPR045000) Tropinone reductase	1
						(IPR005679) Ribosomal protein S12, bacterial-type	1
						(IPR001062) Transcription antitermination protein, NusG	1
						(IPR024134) Superoxide dismutase (Cu/Zn) / superoxide dismutase copper chaperone	1
						(IPR007400) PrpF protein	1
						(IPR011249) Metalloenzyme, LuxS/M16 peptidase-like	1
						(IPR029020) Ammonium/urea transporter	1
						(IPR038248) Dicer dimerisation domain superfamily	1
						(IPR000941) Enolase	1
						(IPR036935) Ribosomal protein L9, N-terminal domain superfamily	1
						(IPR000864) Proteinase inhibitor I13, potato inhibitor I	1
						(IPR042215) CarD-like, C-terminal domain	1
						(IPR035979) RNA-binding domain superfamily	1
						(IPR023213) Chloramphenicol acetyltransferase-like domain superfamily	1
						(IPR000754) Ribosomal protein S9	1
						(IPR022546) Uncharacterised protein family Ycf68	1
						(IPR037447) 40S Ribosomal protein S10	1
						(IPR040244) Protein enhanced disease resistance 4-like	1
						(IPR000231) Ribosomal protein L30e	1
						(IPR039331) Purple acid phosphatase-like	1
						(IPR016169) FAD-binding, type PCMH, subdomain 2	1
						(IPR000218) Ribosomal protein L14P	1
						(IPR001971) Ribosomal protein S11	1
						(IPR012676) TGS-like	1
						(IPR002935) Class I-like SAM-dependent O-methyltransferase	1
						(IPR008978) HSP20-like chaperone	1
						(IPR003256) Ribosomal protein L24	1
						(IPR010089) Flavoprotein WrbA-like	1
						(IPR044965) Glycoside hydrolase family 17, plant	1
						(IPR011250) Outer membrane protein/outer membrane enzyme PagP, beta-barrel	1
						(IPR036354) Proteinase inhibitor I13, potato inhibitor I superfamily	1
						(IPR028909) Ribosomal protein L21-like	1
						(IPR036318) FAD-binding, type PCMH-like superfamily	1
						(IPR005990) Inosine-5'-monophosphate dehydrogenase	1
						(IPR037944) Peroxiredoxin-5-like	1
						(IPR023029) Ribosomal protein S15P	1
						(IPR001141) Ribosomal protein L27e	1
						(IPR004203) Cytochrome c oxidase subunit IV family	1
						(IPR001272) Phosphoenolpyruvate carboxykinase, ATP-utilising	1
						(IPR016167) FAD-binding, type PCMH, subdomain 1	1
						(IPR036624) Hcp1-like superfamily	1
						(IPR036236) Zinc finger C2H2 superfamily	1
						(IPR036526) Carbon-nitrogen hydrolase superfamily	1
						(IPR003231) Acyl carrier protein (ACP)	1
						(IPR020103) Pseudouridine synthase, catalytic domain superfamily	1
						(IPR003578) Small GTPase Rho	1
						(IPR028364) Ribosomal protein L1/ribosomal biogenesis protein	1
						(IPR014780) tRNA pseudouridine synthase II, TruB	1
						(IPR036423) Superoxide dismutase-like, copper/zinc binding domain superfamily	1
						(IPR000424) Primosome PriB/single-strand DNA-binding	1
						(IPR042107) DNA-directed RNA polymerase, beta subunit, external 1 domain superfamily	1
						(IPR002320) Threonine-tRNA ligase, class IIa	1
						(IPR023028) Mannitol-1-phosphate 5-dehydrogenase	1
						(IPR001854) Ribosomal protein L29/L35	1
						(IPR000077) Ribosomal protein L39e	1
						(IPR006276) Cobalamin-independent methionine synthase	1
						(IPR036121) ATPase, F1/V1/A1 complex, alpha/beta subunit, N-terminal domain superfamily	1
						(IPR001314) Peptidase S1A, chymotrypsin family	1
						(IPR005880) Ribosomal protein L2, bacterial/organellar-type	1
						(IPR012347) Ferritin-like	1
						(IPR002649) tRNA (guanine-N1-)-methyltransferase, bacteria	1
						(IPR002136) Ribosomal protein L4/L1e	1
						(IPR005745) Ribosomal protein L14P, bacterial-type	1
						(IPR037045) Peptidase S8 propeptide/proteinase inhibitor I9 superfamily	1
						(IPR009050) Globin-like superfamily	1
						(IPR033309) Crossover junction endonuclease Mus81	1
						(IPR036523) SurE-like phosphatase/nucleotidase superfamily	1
						(IPR036865) CRAL-TRIO lipid binding domain superfamily	1
						(IPR003489) Ribosome hibernation promoting factor/RaiA	1
						(IPR038584) Ribosomal protein L33 superfamily	1
						(IPR044846) Glycoside hydrolase family 10	1
						(IPR001197) Ribosomal protein L10e	1
						(IPR013025) Ribosomal protein L25/L23	1
						(IPR000164) Histone H3/CENP-A	1
						(IPR007047) Flp/Fap pilin component	1
						(IPR002415) H/ACA ribonucleoprotein complex, subunit Nhp2, eukaryote	1
						(IPR005001) RNA-binding protein Hfq	1
						(IPR011042) Six-bladed beta-propeller, TolB-like	1
						(IPR001465) Malate synthase	1

## Sheet: B) InterProScan Domains
2dpi Ss97009 vs 2dpi control			2dpi SsV89101 vs 2dpi control			5dpi Ss97009 vs 5dpi control			5dpi SsV89101 vs 5dpi control			60dpi Ss97009 vs 60dpi control			60dpi SsV89101 vs 60dpi control
IPS Domain	#Seqs		IPS Domain	#Seqs		IPS Domain	#Seqs		IPS Domain	#Seqs		IPS Domain	#Seqs		IPS Domain	#Seqs
(IPR004045) Glutathione S-transferase, N-terminal	5		(IPR002016) Haem peroxidase	4		(IPR000626) Ubiquitin-like domain	7		(IPR000719) Protein kinase domain	6		(IPR002016) Haem peroxidase	7		(IPR003441) NAC domain	2
(IPR000626) Ubiquitin-like domain	3		(IPR004045) Glutathione S-transferase, N-terminal	3		(IPR020846) Major facilitator superfamily domain	6		(IPR001752) Kinesin motor domain	5		(IPR000719) Protein kinase domain	6		(IPR000719) Protein kinase domain	1
(IPR010987) Glutathione S-transferase, C-terminal-like	3		(IPR001471) AP2/ERF domain	2		(IPR019956) Ubiquitin domain	5		(IPR017930) Myb domain	3		(IPR008422) Homeobox KN domain	4		(IPR000726) Glycoside hydrolase, family 19, catalytic	1
(IPR003439) ABC transporter-like, ATP-binding domain	2		(IPR013581) Plant PDR ABC transporter associated	1		(IPR001750) NADH:quinone oxidoreductase/Mrp antiporter, membrane subunit	4		(IPR001005) SANT/Myb domain	3		(IPR033905) Secretory peroxidase	3		(IPR033905) Secretory peroxidase	1
(IPR019956) Ubiquitin domain	2		(IPR000726) Glycoside hydrolase, family 19, catalytic	1		(IPR013766) Thioredoxin domain	3		(IPR001471) AP2/ERF domain	3		(IPR017930) Myb domain	3		(IPR000334) Glycoside hydrolase, family 45	1
(IPR045074) Glutathione S-transferases Tau, C-terminal alpha helical domain, plant	2		(IPR010934) NADH dehydrogenase subunit 5, C-terminal	1		(IPR004045) Glutathione S-transferase, N-terminal	3		(IPR004045) Glutathione S-transferase, N-terminal	3		(IPR000626) Ubiquitin-like domain	3		(IPR002016) Haem peroxidase	1
(IPR010934) NADH dehydrogenase subunit 5, C-terminal	1		(IPR003441) NAC domain	1		(IPR000719) Protein kinase domain	3		(IPR002016) Haem peroxidase	3		(IPR035595) UDP-glycosyltransferase family, conserved site	3		(IPR001205) RNA-directed RNA polymerase, C-terminal domain	4
(IPR001153) Barwin domain	1		(IPR033905) Secretory peroxidase	1		(IPR003439) ABC transporter-like, ATP-binding domain	3		(IPR001878) Zinc finger, CCHC-type	2		(IPR003441) NAC domain	2		(IPR031159) Helper-component proteinase (HC-Pro) cysteine protease (CPD) domain	4
(IPR013057) Amino acid transporter, transmembrane domain	1		(IPR006137) NADH:ubiquinone oxidoreductase-like, 20kDa subunit	1		(IPR001471) AP2/ERF domain	2		(IPR006694) Fatty acid hydroxylase	2		(IPR019956) Ubiquitin domain	2		(IPR016140) Bifunctional inhibitor/plant lipid transfer protein/seed storage helical domain	3
(IPR004046) Glutathione S-transferase, C-terminal	1		(IPR013057) Amino acid transporter, transmembrane domain	1		(IPR000608) Ubiquitin-conjugating enzyme E2	2		(IPR006671) Cyclin, N-terminal	2		(IPR013189) Glycosyl hydrolase family 32, C-terminal	2		(IPR002540) Peptidase S30, polyprotein P1, potyvirus	2
(IPR034347) Glutathione S-transferases Phi, C-terminal	1		(IPR020828) Glyceraldehyde 3-phosphate dehydrogenase, NAD(P) binding domain	1		(IPR010987) Glutathione S-transferase, C-terminal-like	2		(IPR001965) Zinc finger, PHD-type	2		(IPR001750) NADH:quinone oxidoreductase/Mrp antiporter, membrane subunit	2		(IPR013648) Polyprotein, Potyviridae	2
(IPR000719) Protein kinase domain	1		(IPR003439) ABC transporter-like, ATP-binding domain	1		(IPR000726) Glycoside hydrolase, family 19, catalytic	2		(IPR013763) Cyclin-like	2		(IPR010934) NADH dehydrogenase subunit 5, C-terminal	1		(IPR000877) Proteinase inhibitor I12, Bowman-Birk	1
(IPR013581) Plant PDR ABC transporter associated	1		(IPR035595) UDP-glycosyltransferase family, conserved site	1		(IPR013057) Amino acid transporter, transmembrane domain	1		(IPR032697) Squalene cyclase, N-terminal	2		(IPR013057) Amino acid transporter, transmembrane domain	1		(IPR001730) Potyvirus NIa protease (NIa-pro) domain	1
(IPR000726) Glycoside hydrolase, family 19, catalytic	1		(IPR034003) ATP-binding cassette transporter, PDR-like subfamily G, domain 2	1		(IPR004046) Glutathione S-transferase, C-terminal	1		(IPR019787) Zinc finger, PHD-finger	2		(IPR010987) Glutathione S-transferase, C-terminal-like	1		(IPR000668) Peptidase C1A, papain C-terminal	1
(IPR002016) Haem peroxidase	1		(IPR001750) NADH:quinone oxidoreductase/Mrp antiporter, membrane subunit	1		(IPR034347) Glutathione S-transferases Phi, C-terminal	1		(IPR032696) Squalene cyclase, C-terminal	2		(IPR004046) Glutathione S-transferase, C-terminal	1		(IPR001932) PPM-type phosphatase domain	1
(IPR034003) ATP-binding cassette transporter, PDR-like subfamily G, domain 2	1		(IPR002059) Cold-shock protein, DNA-binding	5		(IPR045074) Glutathione S-transferases Tau, C-terminal alpha helical domain, plant	1		(IPR044861) Isopenicillin N synthase-like, Fe(2+) 2OG dioxygenase domain	2		(IPR045074) Glutathione S-transferases Tau, C-terminal alpha helical domain, plant	1		(IPR001480) Bulb-type lectin domain	1
(IPR001750) NADH:quinone oxidoreductase/Mrp antiporter, membrane subunit	1		(IPR001730) Potyvirus NIa protease (NIa-pro) domain	4		(IPR020828) Glyceraldehyde 3-phosphate dehydrogenase, NAD(P) binding domain	1		(IPR012001) Thiamine pyrophosphate enzyme, N-terminal TPP-binding domain	2		(IPR004045) Glutathione S-transferase, N-terminal	1		(IPR013525) ABC-2 type transporter	1
(IPR001730) Potyvirus NIa protease (NIa-pro) domain	10		(IPR011129) Cold shock domain	3		(IPR002059) Cold-shock protein, DNA-binding	18		(IPR016140) Bifunctional inhibitor/plant lipid transfer protein/seed storage helical domain	2		(IPR004860) Homing endonuclease, LAGLIDADG	6		(IPR025910) Plant viral polyprotein P1, serine peptidase domain	1
(IPR001205) RNA-directed RNA polymerase, C-terminal domain	7		(IPR013648) Polyprotein, Potyviridae	3		(IPR011129) Cold shock domain	16		(IPR020561) Phosphoribosylglycinamide synthetase, ATP-grasp (A) domain	2		(IPR001356) Homeobox domain	5		(IPR007117) Expansin, cellulose-binding-like domain	1
(IPR002059) Cold-shock protein, DNA-binding	6		(IPR019844) Cold-shock (CSD) domain	2		(IPR019844) Cold-shock (CSD) domain	13		(IPR001841) Zinc finger, RING-type	2		(IPR011707) Multicopper oxidase, N-termianl	4		(IPR004255) O-acyltransferase, WSD1, N-terminal	1
(IPR031159) Helper-component proteinase (HC-Pro) cysteine protease (CPD) domain	5		(IPR012328) Chalcone/stilbene synthase, C-terminal	2		(IPR001029) Flagellin, D0/D1 domain	7		(IPR001245) Serine-threonine/tyrosine-protein kinase, catalytic domain	2		(IPR011706) Multicopper oxidase, C-terminal	4		(IPR044741) Non-specific lipid-transfer protein-like	1
(IPR019844) Cold-shock (CSD) domain	5		(IPR001099) Chalcone/stilbene synthase, N-terminal	2		(IPR004038) Ribosomal protein L7Ae/L30e/S12e/Gadd45	6		(IPR033734) Jacalin-like lectin domain, plant	1		(IPR017456) CTP synthase, N-terminal	3		(IPR014001) Helicase superfamily 1/2, ATP-binding domain	1
(IPR002540) Peptidase S30, polyprotein P1, potyvirus	5		(IPR007125) Histone H2A/H2B/H3	2		(IPR000795) Translational (tr)-type GTP-binding domain	5		(IPR023780) Chromo domain	1		(IPR013210) Leucine-rich repeat-containing N-terminal, plant-type	3		(IPR006702) Casparian strip membrane protein domain	1
(IPR011129) Cold shock domain	5		(IPR012001) Thiamine pyrophosphate enzyme, N-terminal TPP-binding domain	2		(IPR005824) KOW	5		(IPR013497) DNA topoisomerase, type IA, central	1		(IPR001005) SANT/Myb domain	3		(IPR007094) RNA-directed RNA polymerase, catalytic domain	1
(IPR013648) Polyprotein, Potyviridae	5		(IPR002540) Peptidase S30, polyprotein P1, potyvirus	2		(IPR002942) RNA-binding S4 domain	5		(IPR001229) Jacalin-like lectin domain	1		(IPR033734) Jacalin-like lectin domain, plant	2		(IPR043926) ABC transporter family G domain	1
(IPR007094) RNA-directed RNA polymerase, catalytic domain	3		(IPR006045) Cupin 1	2		(IPR004160) Translation elongation factor EFTu/EF1A, C-terminal	4		(IPR002100) Transcription factor, MADS-box	1		(IPR000782) FAS1 domain	2		(IPR005798) Cytochrome b/b6, C-terminal	1
(IPR025910) Plant viral polyprotein P1, serine peptidase domain	3		(IPR031159) Helper-component proteinase (HC-Pro) cysteine protease (CPD) domain	2		(IPR000254) Cellulose-binding domain, fungal	4		(IPR006171) TOPRIM domain	1		(IPR001229) Jacalin-like lectin domain	2		(IPR001002) Chitin-binding, type 1	1
(IPR001077) O-methyltransferase domain	3		(IPR014044) CAP domain	2		(IPR039556) ICL/PEPM domain	3		(IPR013632) DNA recombination and repair protein Rad51-like, C-terminal	1		(IPR001878) Zinc finger, CCHC-type	2
(IPR011706) Multicopper oxidase, C-terminal	3		(IPR001205) RNA-directed RNA polymerase, C-terminal domain	1		(IPR011058) Cyanovirin-N	3		(IPR000953) Chromo/chromo shadow domain	1		(IPR002100) Transcription factor, MADS-box	2
(IPR006045) Cupin 1	3		(IPR033734) Jacalin-like lectin domain, plant	1		(IPR004014) Cation-transporting P-type ATPase, N-terminal	3		(IPR033121) Peptidase family A1 domain	1		(IPR004182) GRAM domain	2
(IPR006094) FAD linked oxidase, N-terminal	2		(IPR009009) RlpA-like protein, double-psi beta-barrel domain	1		(IPR002379) V-ATPase proteolipid subunit C-like domain	3		(IPR034085) TOG domain	1		(IPR001000) Glycoside hydrolase family 10 domain	2
(IPR008462) CsbD-like domain	2		(IPR007096) RNA-directed RNA polymerase, bacteriophage, catalytic domain	1		(IPR006196) RNA-binding domain, S1, IF1 type	3		(IPR020587) DNA recombination and repair protein RecA, monomer-monomer interface	1		(IPR005123) Oxoglutarate/iron-dependent dioxygenase	2
(IPR001975) Ribosomal protein L40e	2		(IPR004864) Late embryogenesis abundant protein, LEA_2 subgroup	1		(IPR001950) SUI1 domain	3		(IPR001223) Glycoside hydrolase family 18, catalytic domain	1		(IPR027923) Hydrophobic seed protein domain	2
(IPR007125) Histone H2A/H2B/H3	2		(IPR001229) Jacalin-like lectin domain	1		(IPR001650) Helicase, C-terminal	3		(IPR001025) Bromo adjacent homology (BAH) domain	1		(IPR001117) Multicopper oxidase, type 1	2
(IPR000795) Translational (tr)-type GTP-binding domain	2		(IPR007650) Zf-FLZ domain	1		(IPR020040) Ribosomal protein L6, alpha-beta domain	3		(IPR002123) Phospholipid/glycerol acyltransferase	1		(IPR032861) Xylanase inhibitor, N-terminal	2
(IPR008889) VQ	2		(IPR001912) Ribosomal protein S4/S9, N-terminal	1		(IPR041988) Ribosomal protein L26/L24, KOW domain	3		(IPR005123) Oxoglutarate/iron-dependent dioxygenase	1		(IPR026992) Non-haem dioxygenase N-terminal domain	2
(IPR003593) AAA+ ATPase domain	2		(IPR007112) Expansin/pollen allergen, DPBB domain	1		(IPR020189) Translation elongation factor, IF5A C-terminal	3		(IPR013623) NADPH oxidase Respiratory burst	1		(IPR000795) Translational (tr)-type GTP-binding domain	2
(IPR012328) Chalcone/stilbene synthase, C-terminal	2		(IPR003593) AAA+ ATPase domain	1		(IPR022669) Ribosomal protein L2, C-terminal	3		(IPR007330) MIT domain	1		(IPR020683) Ankyrin repeat-containing domain	2
(IPR001099) Chalcone/stilbene synthase, N-terminal	2		(IPR000845) Nucleoside phosphorylase domain	1		(IPR002715) Nascent polypeptide-associated complex NAC domain	3		(IPR013097) Stress responsive alpha-beta barrel	1		(IPR028144) Cysteine-rich transmembrane CYSTM domain	2
(IPR014001) Helicase superfamily 1/2, ATP-binding domain	2		(IPR033121) Peptidase family A1 domain	1		(IPR007125) Histone H2A/H2B/H3	3		(IPR041469) Subtilisin-like protease, fibronectin type-III domain	1		(IPR044861) Isopenicillin N synthase-like, Fe(2+) 2OG dioxygenase domain	2
(IPR002641) Patatin-like phospholipase domain	1		(IPR013210) Leucine-rich repeat-containing N-terminal, plant-type	1		(IPR027486) Ribosomal protein S10 domain	3		(IPR010987) Glutathione S-transferase, C-terminal-like	1		(IPR011759) Cytochrome C oxidase subunit II, transmembrane domain	2
(IPR009009) RlpA-like protein, double-psi beta-barrel domain	1		(IPR044861) Isopenicillin N synthase-like, Fe(2+) 2OG dioxygenase domain	1		(IPR000194) ATPase, F1/V1/A1 complex, alpha/beta subunit, nucleotide-binding domain	3		(IPR000626) Ubiquitin-like domain	1		(IPR000571) Zinc finger, CCCH-type	2
(IPR007096) RNA-directed RNA polymerase, bacteriophage, catalytic domain	1		(IPR021131) Ribosomal protein L18e/L15P	1		(IPR014001) Helicase superfamily 1/2, ATP-binding domain	3		(IPR027923) Hydrophobic seed protein domain	1		(IPR004160) Translation elongation factor EFTu/EF1A, C-terminal	2
(IPR005630) Terpene synthase, metal-binding domain	1		(IPR020829) Glyceraldehyde 3-phosphate dehydrogenase, catalytic domain	1		(IPR003008) Tubulin/FtsZ, GTPase domain	3		(IPR043926) ABC transporter family G domain	1		(IPR001245) Serine-threonine/tyrosine-protein kinase, catalytic domain	2
(IPR004864) Late embryogenesis abundant protein, LEA_2 subgroup	1		(IPR001077) O-methyltransferase domain	1		(IPR002906) Ribosomal protein S27a	3		(IPR002937) Amine oxidase	1		(IPR002932) Glutamate synthase domain	1
(IPR016166) FAD-binding domain, PCMH-type	1		(IPR004860) Homing endonuclease, LAGLIDADG	1		(IPR022967) RNA-binding domain, S1	3		(IPR003601) DNA topoisomerase, type IA, domain 2	1		(IPR000668) Peptidase C1A, papain C-terminal	1
(IPR007650) Zf-FLZ domain	1		(IPR016140) Bifunctional inhibitor/plant lipid transfer protein/seed storage helical domain	1		(IPR004087) K Homology domain	2		(IPR034144) DNA topoisomerase 3-like, TOPRIM domain	1		(IPR034285) Laccase, second cupredoxin domain	1
(IPR007112) Expansin/pollen allergen, DPBB domain	1		(IPR030386) GB1/RHD3-type guanine nucleotide-binding (G) domain	1		(IPR020784) Ribosomal protein L11, N-terminal	2		(IPR004046) Glutathione S-transferase, C-terminal	1		(IPR007650) Zf-FLZ domain	1
(IPR000836) Phosphoribosyltransferase domain	1		(IPR005123) Oxoglutarate/iron-dependent dioxygenase	1		(IPR022666) Ribosomal Proteins L2, RNA binding domain	2		(IPR032308) Jas TPL-binding domain	1		(IPR013978) MEKHLA	1
(IPR000845) Nucleoside phosphorylase domain	1		(IPR014001) Helicase superfamily 1/2, ATP-binding domain	1		(IPR014014) RNA helicase, DEAD-box type, Q motif	2		(IPR034347) Glutathione S-transferases Phi, C-terminal	1		(IPR003033) SCP2 sterol-binding domain	1
(IPR029099) Ribose-phosphate pyrophosphokinase, N-terminal domain	1		(IPR032687) HTH-type transcriptional regulator AraC-type, N-terminal	1		(IPR034907) Nucleoside diphosphate kinase-like domain	2		(IPR032861) Xylanase inhibitor, N-terminal	1		(IPR033121) Peptidase family A1 domain	1
(IPR001223) Glycoside hydrolase family 18, catalytic domain	1		(IPR044862) Prolyl 4-hydroxylase alpha subunit, Fe(2+) 2OG dioxygenase domain	1		(IPR000298) Cytochrome c oxidase subunit III-like	2		(IPR000772) Ricin B, lectin domain	1		(IPR014222) Cytochrome c oxidase, subunit II	1
(IPR000298) Cytochrome c oxidase subunit III-like	1		(IPR043926) ABC transporter family G domain	1		(IPR006694) Fatty acid hydroxylase	2		(IPR013103) Reverse transcriptase, RNA-dependent DNA polymerase	1		(IPR039417) Papain-like cysteine endopeptidase	1
(IPR000368) Sucrose synthase	1		(IPR027923) Hydrophobic seed protein domain	1		(IPR041985) Ribosomal protein L14, KOW motif	2		(IPR013121) Ferric reductase, NAD binding domain	1		(IPR001223) Glycoside hydrolase family 18, catalytic domain	1
(IPR005123) Oxoglutarate/iron-dependent dioxygenase	1		(IPR000571) Zinc finger, CCCH-type	1		(IPR031159) Helper-component proteinase (HC-Pro) cysteine protease (CPD) domain	2		(IPR005162) Retrotransposon gag domain	1		(IPR007125) Histone H2A/H2B/H3	1
(IPR003029) S1 domain	1		(IPR025315) Domain of unknown function DUF4220	1		(IPR001730) Potyvirus NIa protease (NIa-pro) domain	2		(IPR013525) ABC-2 type transporter	1		(IPR000298) Cytochrome c oxidase subunit III-like	1
(IPR007021) Domain of unknown function DUF659	1		(IPR007080) RNA polymerase Rpb1, domain 1	1		(IPR002429) Cytochrome c oxidase subunit II-like C-terminal	2		(IPR002205) DNA topoisomerase, type IIA, subunit A/C-terminal	1		(IPR017926) Glutamine amidotransferase	1
(IPR043926) ABC transporter family G domain	1		(IPR032861) Xylanase inhibitor, N-terminal	1		(IPR016082) Ribosomal protein L30, ferredoxin-like fold domain	2		(IPR001789) Signal transduction response regulator, receiver domain	1		(IPR005804) Fatty acid desaturase domain	1
(IPR006103) Glycoside hydrolase family 2, catalytic domain	1		(IPR003305) Carbohydrate-binding, CenC-like	1		(IPR032697) Squalene cyclase, N-terminal	2		(IPR013112) FAD-binding 8	1		(IPR000260) NADH:ubiquinone oxidoreductase chain 4, N-terminal	1
(IPR005798) Cytochrome b/b6, C-terminal	1		(IPR011547) SLC26A/SulP transporter domain	1		(IPR043605) DUF883, C-terminal domain	2		(IPR013601) FAE1/Type III polyketide synthase-like protein	1		(IPR002772) Glycoside hydrolase family 3 C-terminal domain	1
(IPR004125) Signal recognition particle, SRP54 subunit, M-domain	1		(IPR013525) ABC-2 type transporter	1		(IPR001199) Cytochrome b5-like heme/steroid binding domain	2		(IPR000330) SNF2, N-terminal	1		(IPR042855) v-SNARE, coiled-coil homology domain	1
(IPR034289) Laccase, third cupredoxin domain	1		(IPR002429) Cytochrome c oxidase subunit II-like C-terminal	1		(IPR012988) Ribosomal protein L30, N-terminal	2		(IPR033925) Rad51/DMC1/RadA	1		(IPR002104) Integrase, catalytic domain	1
(IPR005162) Retrotransposon gag domain	1		(IPR021671) PD(D/E)XK endonuclease	1		(IPR009056) Cytochrome c-like domain	2		(IPR005512) PRONE domain	1		(IPR005798) Cytochrome b/b6, C-terminal	1
(IPR005824) KOW	1		(IPR026992) Non-haem dioxygenase N-terminal domain	1		(IPR035808) Ribosomal protein L7, eukaryotic/archaeal	2		(IPR001906) Terpene synthase, N-terminal domain	1		(IPR013154) Alcohol dehydrogenase, N-terminal	1
(IPR013525) ABC-2 type transporter	1		(IPR023616) Cytochrome c oxidase-like, subunit I domain	1		(IPR033935) Ribosomal protein L19, eukaryotic	2		(IPR019956) Ubiquitin domain	1		(IPR000582) Acyl-CoA-binding protein, ACBP	1
(IPR026992) Non-haem dioxygenase N-terminal domain	1		(IPR007117) Expansin, cellulose-binding-like domain	1		(IPR007096) RNA-directed RNA polymerase, bacteriophage, catalytic domain	2		(IPR034197) Cucumisin-like catalytic domain	1		(IPR006594) LIS1 homology motif	1
(IPR033945) Cytochrome c oxidase subunit III domain	1		(IPR000073) Alpha/beta hydrolase fold-1	1		(IPR001912) Ribosomal protein S4/S9, N-terminal	2		(IPR013766) Thioredoxin domain	1		(IPR005541) KNOX2	1
(IPR027486) Ribosomal protein S10 domain	1		(IPR003611) Nuclease associated modular domain 3	1		(IPR013845) Ribosomal protein S4e, central region	2		(IPR001356) Homeobox domain	1		(IPR002487) Transcription factor, K-box	1
(IPR001029) Flagellin, D0/D1 domain	1		(IPR005066) Moybdenum cofactor oxidoreductase, dimerisation	1		(IPR040637) 60S ribosomal protein L10P, insertion domain	2		(IPR000504) RNA recognition motif domain	1		(IPR007275) YTH domain	1
(IPR007117) Expansin, cellulose-binding-like domain	1		(IPR033900) Porin domain, Gram-negative type	1		(IPR003029) S1 domain	2		(IPR012000) Thiamine pyrophosphate enzyme, central domain	1		(IPR013103) Reverse transcriptase, RNA-dependent DNA polymerase	1
(IPR000897) Signal recognition particle, SRP54 subunit, GTPase domain	1		(IPR003582) ShKT domain	1		(IPR005798) Cytochrome b/b6, C-terminal	2		(IPR007647) RNA polymerase Rpb2, domain 5	1		(IPR013525) ABC-2 type transporter	1
(IPR011676) Domain of unknown function DUF1618	1		(IPR012000) Thiamine pyrophosphate enzyme, central domain	1		(IPR004044) K Homology domain, type 2	2		(IPR020588) DNA recombination and repair protein RecA-like, ATP-binding domain	1		(IPR002429) Cytochrome c oxidase subunit II-like C-terminal	1
(IPR002646) Poly A polymerase, head domain	1		(IPR003614) Knottin, scorpion toxin-like	1		(IPR000582) Acyl-CoA-binding protein, ACBP	2		(IPR041792) Purple acid phosphatase, metallophosphatase domain	1		(IPR007120) DNA-directed RNA polymerase, subunit 2, hybrid-binding domain	1
(IPR015793) Pyruvate kinase, barrel	1		(IPR000305) GIY-YIG endonuclease	1		(IPR020783) Ribosomal protein L11, C-terminal	2		(IPR010713) Xyloglucan endo-transglycosylase, C-terminal	1		(IPR001789) Signal transduction response regulator, receiver domain	1
(IPR012492) Protein RED, C-terminal	1					(IPR023798) Ribosomal protein S7 domain	2		(IPR002500) Phosphoadenosine phosphosulphate reductase	1		(IPR034210) Cytochrome c oxidase subunit 2, C-terminal	1
(IPR025525) hAT-like transposase, RNase-H fold	1					(IPR000196) Ribosomal protein L19/L19e	2		(IPR008422) Homeobox KN domain	1		(IPR006867) Domain of unknown function DUF632	1
(IPR008427) Extracellular membrane protein, CFEM domain	1					(IPR013149) Alcohol dehydrogenase, C-terminal	2		(IPR000254) Cellulose-binding domain, fungal	1		(IPR033945) Cytochrome c oxidase subunit III domain	1
(IPR044861) Isopenicillin N synthase-like, Fe(2+) 2OG dioxygenase domain	1					(IPR021131) Ribosomal protein L18e/L15P	2		(IPR000209) Peptidase S8/S53 domain	1		(IPR007117) Expansin, cellulose-binding-like domain	1
(IPR001650) Helicase, C-terminal	1					(IPR002784) Ribosomal protein L14e domain	2		(IPR025064) Domain of unknown function DUF4005	1		(IPR002498) Phosphatidylinositol-4-phosphate 5-kinase, core	1
(IPR011707) Multicopper oxidase, N-termianl	1					(IPR004161) Translation elongation factor EFTu-like, domain 2	2		(IPR010935) SMCs flexible hinge	1		(IPR002379) V-ATPase proteolipid subunit C-like domain	1
(IPR034288) Laccase, first cupredoxin domain	1					(IPR011263) DNA-directed RNA polymerase, RpoA/D/Rpb3-type	2		(IPR007513) Uncharacterised protein family SERF, N-terminal	1		(IPR002921) Fungal lipase-like domain	1
(IPR004860) Homing endonuclease, LAGLIDADG	1					(IPR011545) DEAD/DEAH box helicase domain	2		(IPR028144) Cysteine-rich transmembrane CYSTM domain	1		(IPR012312) Haemerythrin-like	1
(IPR016140) Bifunctional inhibitor/plant lipid transfer protein/seed storage helical domain	1					(IPR023616) Cytochrome c oxidase-like, subunit I domain	2		(IPR010402) CCT domain	1		(IPR004868) DNA-directed DNA polymerase, family B, mitochondria/virus	1
(IPR004161) Translation elongation factor EFTu-like, domain 2	1					(IPR013843) Ribosomal protein S4e, N-terminal	2		(IPR012328) Chalcone/stilbene synthase, C-terminal	1		(IPR000305) GIY-YIG endonuclease	1
(IPR006645) NusG, N-terminal	1					(IPR016040) NAD(P)-binding domain	2		(IPR026960) Reverse transcriptase zinc-binding domain	1		(IPR033133) Pumilio homology domain	1
(IPR015933) Aconitase B, HEAT-like domain	1					(IPR019783) Ribosome maturation protein Sdo1/SBDS, N-terminal	2		(IPR006016) UspA	1		(IPR020097) Pseudouridine synthase I, TruA, alpha/beta domain	1
(IPR020040) Ribosomal protein L6, alpha-beta domain	1					(IPR005225) Small GTP-binding protein domain	2		(IPR001099) Chalcone/stilbene synthase, N-terminal	1		(IPR004038) Ribosomal protein L7Ae/L30e/S12e/Gadd45	1
(IPR007308) Rtr1/RPAP2 domain	1					(IPR012967) Plant methyltransferase dimerisation	2		(IPR040727) Nicotinate phosphoribosyltransferase, N-terminal domain	1		(IPR019844) Cold-shock (CSD) domain	1
(IPR000863) Sulfotransferase domain	1					(IPR012947) Threonyl/alanyl tRNA synthetase, SAD	1		(IPR007726) SS18, N-terminal	1		(IPR023210) NADP-dependent oxidoreductase domain	1
(IPR008906) HAT, C-terminal dimerisation domain	1					(IPR032454) Histone H2A, C-terminal domain	1		(IPR013210) Leucine-rich repeat-containing N-terminal, plant-type	1		(IPR006195) Aminoacyl-tRNA synthetase, class II	1
(IPR033872) Non-specific lipid-transfer protein type 2	1					(IPR011761) ATP-grasp fold	1		(IPR031660) C-terminal associated domain of TOPRIM	1		(IPR044769) 1-phosphatidylinositol-3-phosphate 5-kinase, PIPK catalytic domain	1
(IPR013148) Glycosyl hydrolase family 32, N-terminal	1					(IPR002314) Aminoacyl-tRNA synthetase, class II (G/ P/ S/T)	1		(IPR014001) Helicase superfamily 1/2, ATP-binding domain	1		(IPR000209) Peptidase S8/S53 domain	1
(IPR004160) Translation elongation factor EFTu/EF1A, C-terminal	1					(IPR004839) Aminotransferase, class I/classII	1		(IPR044862) Prolyl 4-hydroxylase alpha subunit, Fe(2+) 2OG dioxygenase domain	1		(IPR032799) Xylanase inhibitor, C-terminal	1
(IPR001841) Zinc finger, RING-type	1					(IPR001251) CRAL-TRIO lipid binding domain	1		(IPR004843) Calcineurin-like phosphoesterase domain, ApaH type	1		(IPR015590) Aldehyde dehydrogenase domain	1
(IPR014039) Translation elongation factor EFTs/EF1B, dimerisation	1					(IPR007667) Hypoxia induced protein, domain	1		(IPR013010) Zinc finger, SIAH-type	1		(IPR000070) Pectinesterase, catalytic	1
(IPR014044) CAP domain	1					(IPR006094) FAD linked oxidase, N-terminal	1		(IPR037401) SnoaL-like domain	1		(IPR033828) CTP synthase GATase domain	1
(IPR002083) MATH/TRAF domain	1					(IPR016166) FAD-binding domain, PCMH-type	1		(IPR017941) Rieske [2Fe-2S] iron-sulphur domain	1		(IPR010402) CCT domain	1
(IPR001245) Serine-threonine/tyrosine-protein kinase, catalytic domain	1					(IPR032088) Starter unit:ACP transacylase	1		(IPR006045) Cupin 1	1		(IPR013747) 3-Oxoacyl-[acyl-carrier-protein (ACP)] synthase III, C-terminal	1
(IPR001870) B30.2/SPRY domain	1					(IPR002013) SAC domain	1		(IPR002219) Protein kinase C-like, phorbol ester/diacylglycerol-binding domain	1		(IPR001173) Glycosyltransferase 2-like	1
(IPR012967) Plant methyltransferase dimerisation	1					(IPR033121) Peptidase family A1 domain	1		(IPR015914) Purple acid phosphatase, N-terminal	1		(IPR009075) Acyl-CoA dehydrogenase/oxidase C-terminal	1
(IPR015795) Pyruvate kinase, C-terminal	1					(IPR001093) IMP dehydrogenase/GMP reductase	1		(IPR018121) Seven-in-absentia protein, TRAF-like domain	1		(IPR013087) Zinc finger C2H2-type	1
(IPR003614) Knottin, scorpion toxin-like	1					(IPR000866) Alkyl hydroperoxide reductase subunit C/ Thiol specific antioxidant	1		(IPR033872) Non-specific lipid-transfer protein type 2	1		(IPR004255) O-acyltransferase, WSD1, N-terminal	1
						(IPR001000) Glycoside hydrolase family 10 domain	1		(IPR000877) Proteinase inhibitor I12, Bowman-Birk	1		(IPR001650) Helicase, C-terminal	1
						(IPR001732) UDP-glucose/GDP-mannose dehydrogenase, N-terminal	1		(IPR000182) GNAT domain	1		(IPR034288) Laccase, first cupredoxin domain	1
						(IPR041982) Ribosomal protein S4, KOW domain	1		(IPR001623) DnaJ domain	1		(IPR016140) Bifunctional inhibitor/plant lipid transfer protein/seed storage helical domain	1
						(IPR005025) NADPH-dependent FMN reductase-like	1		(IPR024593) Domain of unknown function DUF3444	1		(IPR002108) Actin-depolymerising factor homology domain	1
						(IPR005811) ATP-citrate lyase/succinyl-CoA ligase	1		(IPR020189) Translation elongation factor, IF5A C-terminal	1		(IPR004161) Translation elongation factor EFTu-like, domain 2	1
						(IPR044016) Bacterial Ig-like domain 13	1		(IPR014044) CAP domain	1		(IPR001240) N-(5'phosphoribosyl) anthranilate isomerase (PRAI) domain	1
						(IPR016009) tRNA methyltransferase TRMD/TRM10-type domain	1		(IPR035425) CENP-T/Histone H4, histone fold	1		(IPR014001) Helicase superfamily 1/2, ATP-binding domain	1
						(IPR004095) TGS	1		(IPR009721) O-acyltransferase WSD1, C-terminal	1		(IPR003245) Phytocyanin domain	1
						(IPR032861) Xylanase inhibitor, N-terminal	1		(IPR024680) Ribulose-1,5-bisphosphate carboxylase small subunit, N-terminal	1		(IPR033640) Fatty acyl-CoA reductase, C-terminal	1
						(IPR032819) tRNA pseudouridylate synthase B, C-terminal	1		(IPR001220) Legume lectin domain	1		(IPR000756) Diacylglycerol kinase, accessory domain	1
						(IPR041099) Fatty acid synthase subunit beta, N-terminal domain	1		(IPR025422) Transcription factor TGA like domain	1		(IPR001031) Thioesterase	1
						(IPR018805) Cell wall protein YJL171C/Tos1, C-terminal	1		(IPR000095) CRIB domain	1		(IPR006458) Ovate protein family, C-terminal	1
						(IPR007419) BFD-like [2Fe-2S]-binding domain	1		(IPR003582) ShKT domain	1		(IPR001206) Diacylglycerol kinase, catalytic domain	1
						(IPR000494) Receptor L-domain	1		(IPR025733) Iron/zinc purple acid phosphatase-like C-terminal domain	1		(IPR025315) Domain of unknown function DUF4220	1
						(IPR013131) Mannitol dehydrogenase, N-terminal	1		(IPR010259) Peptidase S8 propeptide/proteinase inhibitor I9	1		(IPR014016) UvrD-like helicase, ATP-binding domain	1
						(IPR007120) DNA-directed RNA polymerase, subunit 2, hybrid-binding domain	1		(IPR033896) MADS MEF2-like	1		(IPR005540) KNOX1	1
						(IPR040883) Fatty acid synthase, meander beta sheet domain	1					(IPR002219) Protein kinase C-like, phorbol ester/diacylglycerol-binding domain	1
						(IPR033945) Cytochrome c oxidase subunit III domain	1					(IPR006045) Cupin 1	1
						(IPR000971) Globin	1					(IPR002906) Ribosomal protein S27a	1
						(IPR013601) FAE1/Type III polyketide synthase-like protein	1					(IPR004364) Aminoacyl-tRNA synthetase, class II (D/K/N)	1
						(IPR041715) Class II Histidinyl-tRNA synthetase (HisRS)-like catalytic core domain	1					(IPR003305) Carbohydrate-binding, CenC-like	1
						(IPR001906) Terpene synthase, N-terminal domain	1					(IPR002059) Cold-shock protein, DNA-binding	1
						(IPR000504) RNA recognition motif domain	1					(IPR038005) Virus X resistance protein-like, coiled-coil domain	1
						(IPR000305) GIY-YIG endonuclease	1					(IPR013148) Glycosyl hydrolase family 32, N-terminal	1
						(IPR011260) RNA polymerase, alpha subunit, C-terminal	1					(IPR005539) ELK domain	1
						(IPR007055) BON domain	1					(IPR004331) SPX domain	1
						(IPR023210) NADP-dependent oxidoreductase domain	1					(IPR027399) Alcohol dehydrogenase GroES-associated	1
						(IPR000209) Peptidase S8/S53 domain	1					(IPR024438) Staygreen protein	1
						(IPR001254) Serine proteases, trypsin domain	1					(IPR023616) Cytochrome c oxidase-like, subunit I domain	1
						(IPR032696) Squalene cyclase, C-terminal	1					(IPR041677) DNA2/NAM7 helicase, helicase domain	1
						(IPR015590) Aldehyde dehydrogenase domain	1					(IPR005797) Cytochrome b/b6, N-terminal	1
						(IPR003593) AAA+ ATPase domain	1					(IPR009721) O-acyltransferase WSD1, C-terminal	1
						(IPR025525) hAT-like transposase, RNase-H fold	1					(IPR016040) NAD(P)-binding domain	1
						(IPR008427) Extracellular membrane protein, CFEM domain	1					(IPR000757) Glycoside hydrolase family 16	1
						(IPR001099) Chalcone/stilbene synthase, N-terminal	1					(IPR013201) Cathepsin propeptide inhibitor domain (I29)	1
						(IPR013210) Leucine-rich repeat-containing N-terminal, plant-type	1					(IPR000717) Proteasome component (PCI) domain	1
						(IPR002629) Cobalamin-independent methionine synthase MetE, C-terminal/archaeal	1					(IPR012946) X8 domain	1
						(IPR044031) TssC1, N-terminal	1					(IPR041118) Rx, N-terminal	1
						(IPR034113) Golgi-associated plant pathogenesis-related protein 1, SCP domain	1					(IPR005225) Small GTP-binding protein domain	1
						(IPR013087) Zinc finger C2H2-type	1					(IPR020810) Enolase, C-terminal TIM barrel domain	1
						(IPR041997) Ribosomal Protein L6, KOW domain	1					(IPR011129) Cold shock domain	1
						(IPR001077) O-methyltransferase domain	1					(IPR025723) Anion-transporting ATPase-like domain	1
						(IPR020070) Ribosomal protein L9, N-terminal	1					(IPR010259) Peptidase S8 propeptide/proteinase inhibitor I9	1
						(IPR006645) NusG, N-terminal	1					(IPR033896) MADS MEF2-like	1
						(IPR007642) RNA polymerase Rpb2, domain 2	1					(IPR013648) Polyprotein, Potyviridae	1
						(IPR003711) CarD-like/TRCF domain	1
						(IPR013096) Cupin 2, conserved barrel	1
						(IPR000551) MerR-type HTH domain	1
						(IPR032519) YbgF, trimerisation domain	1
						(IPR002068) Alpha crystallin/Hsp20 domain	1
						(IPR006045) Cupin 1	1
						(IPR018119) Strictosidine synthase, conserved region	1
						(IPR015914) Purple acid phosphatase, N-terminal	1
						(IPR007484) Peptidase M28	1
						(IPR016180) Ribosomal protein L10e/L16	1
						(IPR013215) Cobalamin-independent methionine synthase MetE, N-terminal	1
						(IPR029480) Transposase-associated domain	1
						(IPR009081) Phosphopantetheine binding ACP domain	1
						(IPR029482) Putative peptidase domain, HRXXH	1
						(IPR007863) Peptidase M16, C-terminal	1
						(IPR013857) NADH:ubiquinone oxidoreductase intermediate-associated protein 30	1
						(IPR003010) Carbon-nitrogen hydrolase	1
						(IPR017932) Glutamine amidotransferase type 2 domain	1
						(IPR014026) UDP-glucose/GDP-mannose dehydrogenase, dimerisation	1
						(IPR002828) Survival protein SurE-like phosphatase/nucleotidase	1
						(IPR014162) Cell division coordinator CpoB, C-terminal	1
						(IPR000156) Ran binding domain	1
						(IPR024655) Uncharacterised protein family, glycosyl hydrolase catalytic domain	1
						(IPR020810) Enolase, C-terminal TIM barrel domain	1
						(IPR010259) Peptidase S8 propeptide/proteinase inhibitor I9	1
						(IPR018628) Cytochrome c oxidase assembly factor 3, mitochondrial, coiled-coil domain	1
						(IPR005818) Linker histone H1/H5, domain H15	1
						(IPR002641) Patatin-like phospholipase domain	1
						(IPR005630) Terpene synthase, metal-binding domain	1
						(IPR000782) FAS1 domain	1
						(IPR041991) Eukaryotic Ribosomal Protein L27, KOW domain	1
						(IPR004154) Anticodon-binding	1
						(IPR008462) CsbD-like domain	1
						(IPR003759) Cobalamin (vitamin B12)-binding module, cap domain	1
						(IPR013650) ATP-grasp fold, succinyl-CoA synthetase-type	1
						(IPR025607) Ribosomal protein L5 eukaryotic/L18 archaeal, C-terminal	1
						(IPR017927) FAD-binding domain, ferredoxin reductase-type	1
						(IPR025452) Domain of unknown function DUF4218	1
						(IPR008147) Glutamine synthetase, beta-Grasp domain	1
						(IPR017926) Glutamine amidotransferase	1
						(IPR003151) PIK-related kinase, FAT	1
						(IPR007644) RNA polymerase, beta subunit, protrusion	1
						(IPR011262) DNA-directed RNA polymerase, insert domain	1
						(IPR007527) Zinc finger, SWIM-type	1
						(IPR013154) Alcohol dehydrogenase, N-terminal	1
						(IPR020575) Heat shock protein Hsp90, N-terminal	1
						(IPR011994) Cytidylate kinase domain	1
						(IPR041232) Nucleoplasmin-like domain	1
						(IPR020069) Ribosomal protein L9, C-terminal	1
						(IPR013740) Redoxin	1
						(IPR001867) OmpR/PhoB-type DNA-binding domain	1
						(IPR044032) TssC1, C-terminal	1
						(IPR032277) 40S ribosomal protein S4, C-terminal domain	1
						(IPR014911) Type 4 secretion system, PilS, N-terminal	1
						(IPR003137) PA domain	1
						(IPR034193) Proteinase K-like catalytic domain	1
						(IPR003611) Nuclease associated modular domain 3	1
						(IPR040533) Four helical bundle domain	1
						(IPR004853) Sugar phosphate transporter domain	1
						(IPR019479) Peroxiredoxin, C-terminal	1
						(IPR000477) Reverse transcriptase domain	1
						(IPR020843) Polyketide synthase, enoylreductase domain	1
						(IPR008146) Glutamine synthetase, catalytic domain	1
						(IPR019832) Manganese/iron superoxide dismutase, C-terminal	1
						(IPR020546) ATP synthase, F1 complex, delta/epsilon subunit, N-terminal	1
						(IPR000172) Glucose-methanol-choline oxidoreductase, N-terminal	1
						(IPR003594) Histidine kinase/HSP90-like ATPase	1
						(IPR019462) DNA-directed RNA polymerase, beta subunit, external 1 domain	1
						(IPR001424) Superoxide dismutase, copper/zinc binding domain	1
						(IPR025755) 60S ribosomal protein L4, C-terminal domain	1
						(IPR000780) MCP methyltransferase, CheR-type	1
						(IPR033728) Threonine-tRNA ligase catalytic core domain	1
						(IPR018316) Tubulin/FtsZ, 2-layer sandwich domain	1
						(IPR041792) Purple acid phosphatase, metallophosphatase domain	1
						(IPR022641) Chemotaxis receptor methyltransferase CheR, N-terminal	1
						(IPR013118) Mannitol dehydrogenase, C-terminal	1
						(IPR008331) Ferritin/DPS protein domain	1
						(IPR006195) Aminoacyl-tRNA synthetase, class II	1
						(IPR002048) EF-hand domain	1
						(IPR001179) FKBP-type peptidyl-prolyl cis-trans isomerase domain	1
						(IPR012328) Chalcone/stilbene synthase, C-terminal	1
						(IPR001351) Ribosomal protein S3, C-terminal	1
						(IPR044861) Isopenicillin N synthase-like, Fe(2+) 2OG dioxygenase domain	1
						(IPR004860) Homing endonuclease, LAGLIDADG	1
						(IPR010854) YdgH/BhsA/McbA-like domain	1
						(IPR016140) Bifunctional inhibitor/plant lipid transfer protein/seed storage helical domain	1
						(IPR018978) Ribosome maturation protein Sdo1/SBDS, C-terminal	1
						(IPR013221) Mur ligase, central	1
						(IPR043604) DUF883, N-terminal domain	1
						(IPR040899) Fatty acid synthase subunit alpha, acyl carrier domain	1
						(IPR004843) Calcineurin-like phosphoesterase domain, ApaH type	1
						(IPR008906) HAT, C-terminal dimerisation domain	1
						(IPR041550) Fatty acid synthase type I, helical	1
						(IPR011765) Peptidase M16, N-terminal	1
						(IPR001932) PPM-type phosphatase domain	1
						(IPR003965) Fatty acid synthase	1
						(IPR002145) Ribbon-helix-helix protein, CopG	1
						(IPR041694) Oxidoreductase, N-terminal domain	1
						(IPR013565) Fatty acid synthase beta subunit AflB /Fas1-like, central domain	1
						(IPR004100) ATPase, F1/V1/A1 complex, alpha/beta subunit, N-terminal domain	1
						(IPR024041) Ammonium transporter AmtB-like domain	1
						(IPR014044) CAP domain	1
						(IPR035425) CENP-T/Histone H4, histone fold	1
						(IPR005034) Dicer dimerisation domain	1
						(IPR004841) Amino acid permease/ SLC12A domain	1
						(IPR007127) RNA polymerase sigma factor 70, region 1.1	1
						(IPR018807) Cell wall protein YJL171C/Tos1, N-terminal	1
						(IPR002509) NodB homology domain	1
						(IPR032440) 40S ribosomal protein S11, N-terminal	1
						(IPR025733) Iron/zinc purple acid phosphatase-like C-terminal domain	1
						(IPR003953) FAD-dependent oxidoreductase 2, FAD binding domain	1
						(IPR021139) NYN domain, limkain-b1-type	1
						(IPR014030) Beta-ketoacyl synthase, N-terminal	1
						(IPR013648) Polyprotein, Potyviridae	1
						(IPR012606) Ribosomal protein S13/S15, N-terminal	1
						(IPR005326) Plectin/S10, N-terminal	1

## Sheet: C) InterProScan Sites
2dpi Ss97009 vs 2dpi control			2dpi SsV89101 vs 2dpi control			5dpi Ss97009 vs 5dpi control			5dpi SsV89101 vs 5dpi control			60dpi Ss97009 vs 60dpi control			60dpi SsV89101 vs 60dpi control
IPS Site	#Seqs		IPS Site	#Seqs		IPS Site	#Seqs		IPS Site	#Seqs		IPS Site	#Seqs		IPS Site	#Seqs
(IPR017972) Cytochrome P450, conserved site	4		(IPR017972) Cytochrome P450, conserved site	4		(IPR019954) Ubiquitin conserved site	5		(IPR017441) Protein kinase, ATP binding site	3		(IPR002355) Multicopper oxidase, copper-binding site	3		(IPR019793) Peroxidases heam-ligand binding site	1
(IPR019780) Germin, manganese binding site	3		(IPR018244) Allergen V5/Tpx-1-related, conserved site	3		(IPR019926) Ribosomal protein L3, conserved site	4		(IPR008271) Serine/threonine-protein kinase, active site	3		(IPR017441) Protein kinase, ATP binding site	3		(IPR031311) Chitin-binding type R&R consensus	1
(IPR018244) Allergen V5/Tpx-1-related, conserved site	2		(IPR019793) Peroxidases heam-ligand binding site	2		(IPR005829) Sugar transporter, conserved site	4		(IPR002365) Terpene synthase, conserved site	2		(IPR019794) Peroxidase, active site	3		(IPR018371) Chitin-binding, type 1, conserved site	1
(IPR019954) Ubiquitin conserved site	2		(IPR019780) Germin, manganese binding site	2		(IPR018523) Isocitrate lyase/phosphorylmutase, conserved site	3		(IPR019809) Histone H4, conserved site	2		(IPR019954) Ubiquitin conserved site	2
(IPR017949) Thaumatin, conserved site	2		(IPR019809) Histone H4, conserved site	2		(IPR031157) Tr-type G domain, conserved site	3		(IPR017972) Cytochrome P450, conserved site	2		(IPR033138) Multicopper oxidases, conserved site	2
(IPR002355) Multicopper oxidase, copper-binding site	1		(IPR019794) Peroxidase, active site	2		(IPR005825) Ribosomal protein L24/L26, conserved site	3		(IPR019821) Kinesin motor domain, conserved site	1		(IPR031157) Tr-type G domain, conserved site	2
(IPR000842) Phosphoribosyl pyrophosphate synthetase, conserved site	1		(IPR017949) Thaumatin, conserved site	1		(IPR020537) ATP synthase, F0 complex, subunit C, DCCD-binding site	3		(IPR018117) DNA methylase, C-5 cytosine-specific, active site	1		(IPR019793) Peroxidases heam-ligand binding site	2
(IPR033138) Multicopper oxidases, conserved site	1		(IPR001196) Ribosomal protein L15, conserved site	1		(IPR018181) Heat shock protein 70, conserved site	3		(IPR018120) Glycoside hydrolase family 1, active site	1		(IPR008271) Serine/threonine-protein kinase, active site	2
(IPR020574) Ribosomal protein S9, conserved site	1		(IPR001216) Cysteine synthase/cystathionine beta-synthase, pyridoxal-phosphate attachment site	1		(IPR019809) Histone H4, conserved site	3		(IPR018244) Allergen V5/Tpx-1-related, conserved site	1		(IPR018225) Transaldolase, active site	1
(IPR018209) Pyruvate kinase, active site	1		(IPR018261) Ribosomal protein L27, conserved site	1		(IPR018281) Ribosomal protein S3Ae, conserved site	2		(IPR019954) Ubiquitin conserved site	1		(IPR018053) Glycoside hydrolase, family 32, active site	1
(IPR001579) Glycosyl hydrolases family 18 (GH18) active site	1		(IPR018278) Ribosomal protein S21, conserved site	1		(IPR022671) Ribosomal protein L2, conserved site	2		(IPR001014) Ribosomal protein L23/L25, conserved site	1		(IPR018181) Heat shock protein 70, conserved site	1
(IPR018226) Barwin, conserved site	1		(IPR020830) Glyceraldehyde 3-phosphate dehydrogenase, active site	1		(IPR020785) Ribosomal protein L11, conserved site	2		(IPR018204) Tryptophan synthase, alpha chain, active site	1		(IPR017970) Homeobox, conserved site	1
(IPR015869) Transcription antitermination protein, NusG, bacteria, conserved site	1					(IPR001505) Copper centre Cu(A)	2		(IPR023828) Peptidase S8, subtilisin, Ser-active site	1		(IPR023011) ATP synthase, F0 complex, subunit A, active site	1
(IPR031157) Tr-type G domain, conserved site	1					(IPR018130) Ribosomal protein S2, conserved site	2		(IPR020904) Short-chain dehydrogenase/reductase, conserved site	1		(IPR001505) Copper centre Cu(A)	1
(IPR017441) Protein kinase, ATP binding site	1					(IPR020606) Ribosomal protein S7, conserved site	2		(IPR019793) Peroxidases heam-ligand binding site	1		(IPR020904) Short-chain dehydrogenase/reductase, conserved site	1
(IPR018101) Translation elongation factor Ts, conserved site	1					(IPR018260) Ribosomal protein L22/L17, conserved site	2		(IPR000048) IQ motif, EF-hand binding site	1		(IPR018130) Ribosomal protein S2, conserved site	1
(IPR017871) ABC transporter-like, conserved site	1					(IPR018079) Ribosomal protein S4, conserved site	2		(IPR033129) Phosphoenolpyruvate carboxylase, His active site	1		(IPR020809) Enolase, conserved site	1
(IPR020816) Histone-like DNA-binding protein, conserved site	1					(IPR022991) Ribosomal protein L30e, conserved site	2		(IPR032831) Prokaryotic lipoprotein-attachment site	1		(IPR022991) Ribosomal protein L30e, conserved site	1
						(IPR018199) Ribosomal protein S4e, N-terminal, conserved site	2		(IPR018129) Phosphoenolpyruvate carboxylase, Lys active site	1		(IPR000169) Cysteine peptidase, cysteine active site	1
						(IPR032458) Histone H2A conserved site	2		(IPR020559) Phosphoribosylglycinamide synthetase, conserved site	1		(IPR031158) Glycosyl hydrolases family 10, active site	1
						(IPR018268) Ribosomal protein S10, conserved site	2		(IPR019786) Zinc finger, PHD-type, conserved site	1		(IPR018357) Hexapeptide transferase, conserved site	1
						(IPR019775) WD40 repeat, conserved site	2					(IPR002328) Alcohol dehydrogenase, zinc-type, conserved site	1
						(IPR000629) ATP-dependent RNA helicase DEAD-box, conserved site	2					(IPR017964) DNA-directed DNA polymerase, family B, conserved site	1
						(IPR018259) Ribosomal protein L21e, conserved site	2					(IPR004001) Actin, conserved site	1
						(IPR018506) Cytochrome b5, heme-binding site	2					(IPR017949) Thaumatin, conserved site	1
						(IPR023011) ATP synthase, F0 complex, subunit A, active site	2					(IPR025661) Cysteine peptidase, asparagine active site	1
						(IPR018098) Ribosomal S24e conserved site	2					(IPR001858) Phosphatidylethanolamine-binding, conserved site	1
						(IPR004001) Actin, conserved site	2					(IPR019780) Germin, manganese binding site	1
						(IPR021132) Ribosomal protein L18e, conserved site	2					(IPR006089) Acyl-CoA dehydrogenase, conserved site	1
						(IPR017972) Cytochrome P450, conserved site	2					(IPR019809) Histone H4, conserved site	1
						(IPR018256) Ribosomal protein L13e, conserved site	2					(IPR020789) RNA polymerases, subunit N, zinc binding site	1
						(IPR000222) PPM-type phosphatase, divalent cation binding	1					(IPR017972) Cytochrome P450, conserved site	1
						(IPR028626) Ribosomal protein S28e conserved site	1					(IPR020902) Actin/actin-like conserved site	1
						(IPR002358) Ribosomal protein L6, conserved site	1					(IPR025660) Cysteine peptidase, histidine active site	1
						(IPR019972) Ribosomal protein L14P, conserved site	1					(IPR001969) Aspartic peptidase, active site	1
						(IPR023563) Ribosomal protein L13, conserved site	1
						(IPR006093) Oxygen oxidoreductase covalent FAD-binding site	1
						(IPR004840) Amino acid permease, conserved site	1
						(IPR002365) Terpene synthase, conserved site	1
						(IPR018277) Ribosomal protein S19e, conserved site	1
						(IPR018280) Ribosomal protein S3, conserved site	1
						(IPR017871) ABC transporter-like, conserved site	1
						(IPR020809) Enolase, conserved site	1
						(IPR018255) Ribosomal protein L10e, conserved site	1
						(IPR004845) Type II secretion system protein GspD, conserved site	1
						(IPR018262) Ribosomal protein L27e, conserved site	1
						(IPR018170) Aldo/keto reductase, conserved site	1
						(IPR002363) Ribosomal protein L10, eubacterial, conserved site	1
						(IPR023188) DNA-binding protein Dps, conserved site	1
						(IPR018266) Ribosomal protein L35Ae, conserved site	1
						(IPR018204) Tryptophan synthase, alpha chain, active site	1
						(IPR015869) Transcription antitermination protein, NusG, bacteria, conserved site	1
						(IPR015875) IMP dehydrogenase / GMP reductase, conserved site	1
						(IPR018264) Ribosomal protein L33, conserved site	1
						(IPR019780) Germin, manganese binding site	1
						(IPR018114) Serine proteases, trypsin family, histidine active site	1
						(IPR001524) Glycoside hydrolase, family 6, conserved site	1
						(IPR001522) Fatty acid desaturase type 1, conserved site	1
						(IPR004037) Ribosomal protein L7Ae conserved site	1
						(IPR023638) Ribosomal protein L19/L19e conserved site	1
						(IPR027302) Glutamine synthetase, N-terminal conserved site	1
						(IPR020902) Actin/actin-like conserved site	1
						(IPR017866) Succinyl-CoA synthetase, beta subunit, conserved site	1
						(IPR018278) Ribosomal protein S21, conserved site	1
						(IPR020830) Glyceraldehyde 3-phosphate dehydrogenase, active site	1
						(IPR018247) EF-Hand 1, calcium-binding site	1
						(IPR018086) NADH:ubiquinone oxidoreductase, subunit 1, conserved site	1
						(IPR018065) Ribosomal protein L34e, conserved site	1
						(IPR018120) Glycoside hydrolase family 1, active site	1
						(IPR018282) Ribosomal protein S6e, conserved site	1
						(IPR022398) Peptidase S8, subtilisin, His-active site	1
						(IPR019979) Ribosomal protein S17, conserved site	1
						(IPR020939) Ribosomal protein L34, conserved site	1
						(IPR020904) Short-chain dehydrogenase/reductase, conserved site	1
						(IPR023313) Ubiquitin-conjugating enzyme, active site	1
						(IPR033116) Serine proteases, trypsin family, serine active site	1
						(IPR008271) Serine/threonine-protein kinase, active site	1
						(IPR018201) Beta-ketoacyl synthase, active site	1
						(IPR023673) Ribosomal protein L1, conserved site	1
						(IPR023005) Nucleoside diphosphate kinase, active site	1
						(IPR000132) Nitrilase/cyanide hydratase, conserved site	1
						(IPR002359) Ribosomal protein L6, conserved site-2	1
						(IPR018273) Ribosomal protein S17e, conserved site	1
						(IPR018258) Ribosomal protein L21, conserved site	1
						(IPR002328) Alcohol dehydrogenase, zinc-type, conserved site	1
						(IPR019830) Malate synthase, conserved site	1
						(IPR019833) Manganese/iron superoxide dismutase, binding site	1
						(IPR013838) Beta tubulin, autoregulation binding site	1
						(IPR017441) Protein kinase, ATP binding site	1
						(IPR017975) Tubulin, conserved site	1
						(IPR029760) Glutathione peroxidase conserved site	1
						(IPR029759) Glutathione peroxidase active site	1
						(IPR027303) Glutamine synthetase, glycine-rich site	1
						(IPR018467) CO/COL/TOC1, conserved site	1
						(IPR018279) Ribosomal protein S21e, conserved site	1
